# Supplementary material for: A versatile and practical one-pot strategy for a greener, waste-minimized synthesis of aryloxy- and alkyloxy-substituted metallophthalocyanines via tandem S N Ar-cyclotetramerization
Source: Royal Society of Chemistry journal article supplement (doi:10.1039/d5qo01267h), 2025-12-23
Supplement: d5qo01267h2.pdf [file d5qo01267h2.pdf]

Supplementary Information

**A Versatile and Practical One-Pot Strategy for a Greener, Waste-Minimized  
Synthesis of Aryloxy- and Alkyloxy-Substituted Metallophthalocyanines via  
Tandem S<sub>N</sub>Ar-cyclotetramerization**

*Federica Palmeri<sup>a,b\*</sup>, Venanzio Raglione<sup>c\*</sup>, Laura Mancini<sup>b,†</sup>, Gloria Zanotti<sup>b\*</sup>*

<sup>a</sup>Department of Chemistry, La Sapienza University of Rome, P.le Aldo Moro 5, 00185, Rome, Italy

<sup>b</sup>Istituto di Struttura della Materia (ISM) Consiglio Nazionale delle Ricerche (CNR), Strada  
provinciale 35d/9, 00010, Montelibretti, Italy

<sup>c</sup>Istituto di Struttura della Materia (ISM) Consiglio Nazionale delle Ricerche (CNR), Via del Fosso  
del Cavaliere 100, 00133, Rome, Italy

<sup>†</sup>Present address: UOSD Medicina di Precisione in Senologia, Fondazione Policlinico A. Gemelli,  
L.go A. Gemelli 8, 00168, Rome, Italy

## Table of contents

|                                                                                                                                          |     |
|------------------------------------------------------------------------------------------------------------------------------------------|-----|
| General procedure for solvent recovery .....                                                                                             | S4  |
| Spectroscopic and Analytical Data of target compounds .....                                                                              | S5  |
| <sup>1</sup> H NMR spectrum of tetra-(3,5-dimethylphenoxy)-zinc-phthalocyanine (1) in THF- <i>d</i> <sub>8</sub> . ....                  | S14 |
| <sup>13</sup> C NMR spectrum of tetra-(3,5-dimethylphenoxy)-zinc-phthalocyanine (1) in THF- <i>d</i> <sub>8</sub> . ....                 | S14 |
| <sup>1</sup> H NMR spectrum of tetra-( <i>p</i> -tolylloxy)-zinc-phthalocyanine (2) in THF- <i>d</i> <sub>8</sub> . ....                 | S15 |
| <sup>13</sup> C NMR spectrum of tetra-( <i>p</i> -tolylloxy)-zinc-phthalocyanine (2) in THF- <i>d</i> <sub>8</sub> . ....                | S15 |
| <sup>1</sup> H NMR spectrum of tetra-(4-iodo-2,6-dimethylphenoxy)-zinc-phthalocyanine (3) in Pyr- <i>d</i> <sub>5</sub> . ....           | S16 |
| <sup>13</sup> C NMR spectrum of tetra-(4-iodo-2,6-dimethylphenoxy)-zinc-phthalocyanine (3) in Pyr- <i>d</i> <sub>5</sub> . ....          | S16 |
| <sup>1</sup> H NMR spectrum of <i>tert</i> -butyl(4-hydroxyphenyl)carbamate (4a) in CDCl <sub>3</sub> . ....                             | S17 |
| <sup>13</sup> C NMR spectrum of <i>tert</i> -butyl(4-hydroxyphenyl)carbamate (4a) in CDCl <sub>3</sub> . ....                            | S17 |
| <sup>1</sup> H NMR spectrum of tetra-(3,5-bis(trifluoromethyl)phenoxy)-zinc-phthalocyanine (5) in THF- <i>d</i> <sub>8</sub> .<br>.....  | S18 |
| <sup>13</sup> C NMR spectrum of tetra-(3,5-bis(trifluoromethyl)phenoxy)-zinc-phthalocyanine (5) in THF- <i>d</i> <sub>8</sub> .<br>..... | S18 |
| <sup>1</sup> H NMR spectrum of tetra-(2-dimethylaminoethoxy)-zinc-phthalocyanine (6) in Pyr- <i>d</i> <sub>5</sub> . ....                | S19 |
| <sup>13</sup> C NMR spectrum of tetra-(2-dimethylaminoethoxy)-zinc-phthalocyanine (6) in Pyr- <i>d</i> <sub>5</sub> . ....               | S19 |
| <sup>1</sup> H NMR spectrum of tetra-(hexyloxy)-zinc-phthalocyanine (7) in THF- <i>d</i> <sub>8</sub> . ....                             | S20 |
| <sup>13</sup> C NMR spectrum of tetra-(hexyloxy)-zinc-phthalocyanine (7) in THF- <i>d</i> <sub>8</sub> . ....                            | S20 |
| <sup>1</sup> H NMR spectrum of octakis(3,5-dimethylphenoxy)-zinc-phthalocyanine (8) in THF- <i>d</i> <sub>8</sub> . ....                 | S21 |
| <sup>13</sup> C NMR spectrum of octakis(3,5-dimethylphenoxy)-zinc-phthalocyanine (8) in THF- <i>d</i> <sub>8</sub> . ....                | S21 |
| <sup>1</sup> H NMR spectrum of octakis( <i>p</i> -tolylloxy)-zinc-phthalocyanine (9) in THF- <i>d</i> <sub>8</sub> . ....                | S22 |
| <sup>13</sup> C NMR spectrum of octakis( <i>p</i> -tolylloxy)-zinc-phthalocyanine (9) in THF- <i>d</i> <sub>8</sub> . ....               | S22 |
| ATR spectrum of tetra-(3,5-dimethylphenoxy)-zinc-phthalocyanine (1). ....                                                                | S23 |
| ATR spectrum of tetra-( <i>p</i> -tolylloxy)-zinc-phthalocyanine (2). ....                                                               | S23 |
| ATR spectrum of tetra-(4-iodo-2,6-dimethylphenoxy)-zinc-phthalocyanine (3). ....                                                         | S24 |
| ATR spectrum of phthalocyanine (4). ....                                                                                                 | S24 |
| ATR spectrum of tetra-(3,5-bis(trifluoromethyl)phenoxy)-zinc-phthalocyanine (5). ....                                                    | S25 |
| ATR spectrum of tetra-(2-dimethylaminoethoxy)-zinc-phthalocyanine (6). ....                                                              | S25 |
| ATR spectrum of tetra-(hexyloxy)-zinc-phthalocyanine (7). ....                                                                           | S26 |
| ATR spectrum of octakis(3,5-dimethylphenoxy)-zinc-phthalocyanine (8). ....                                                               | S26 |
| ATR spectrum of octakis( <i>p</i> -tolylloxy)-zinc-phthalocyanine (9). ....                                                              | S27 |
| UV-vis spectra of the synthesized zinc phthalocyanines (1-9). ....                                                                       | S28 |
| MALDI-TOF spectrum of tetra-(3,5-dimethylphenoxy)-zinc-phthalocyanine (1). ....                                                          | S29 |
| MALDI-TOF spectrum of tetra-( <i>p</i> -tolylloxy)-zinc-phthalocyanine (2). ....                                                         | S30 |

|                                                                                              |     |
|----------------------------------------------------------------------------------------------|-----|
| MALDI-TOF spectrum of tetra-(4-iodo-2,6-dimethylphenoxy)-zinc-phthalocyanine (3). .....      | S31 |
| MALDI-TOF spectrum of tetra-(3,5-bis(trifluoromethyl)phenoxy)-zinc-phthalocyanine (5). ..... | S32 |
| MALDI-TOF spectrum of tetra-(2-dimethylaminoethoxy)-zinc-phthalocyanine (6). .....           | S33 |
| MALDI-TOF spectrum of tetra-(hexyloxy)-zinc-phthalocyanine (7). .....                        | S34 |
| MALDI-TOF spectrum of octakis(3,5-dimethylphenoxy)-zinc-phthalocyanine (8). .....            | S35 |
| MALDI-TOF spectrum of octakis(p-tolyloxy)-zinc-phthalocyanine (9). .....                     | S36 |
| E-factor calculation .....                                                                   | S37 |
| References .....                                                                             | S47 |

## General procedure for solvent recovery

Regarding the use of methanol and methanol/water mixtures during the workup: To minimize the amount of DMF and DBU in the recoverable mixture, we removed it separately during the filtration of the quenched reaction (with 1 N HCl), followed by washings with water. Then, the mixed water-methanol waste generated from crude and product washings in several reactions was collected into a single flask to reach a working volume of approximately 150–200 mL, suitable for distillation. Methanol does not form binary azeotropes with water and was therefore recovered using a standard distillation setup (atmospheric pressure) equipped with a Vigreux column to improve separation efficiency.

Regarding the organic solvents used as eluents: The solvent mixtures were recovered individually for the filtration on silica pad of each reaction by collecting the packing solvent (hexane), deposition solvent (THF), and eluted fractions. We then recovered the solvent mixtures using a rotary evaporator until dryness, discarding only a small fraction collected at the beginning of the evaporation process, and re-used the recovered mixtures several times for subsequent silica-pad filtrations, supplementing the volume when necessary with freshly prepared solvent at the initially set polarity. Since the separation is relatively simple, phthalocyanines being the only macrocyclic products and polar impurities remaining at the baseline ( $R_f \sim 0$ ), the choice of eluent does not require a narrow polarity window, provided that it is not so polar as to co-elute the polar impurities with the target compound.

## Spectroscopic and Analytical Data of target compounds

### Tetra-(3,5-dimethylphenoxy)-zinc-phthalocyanine (1).

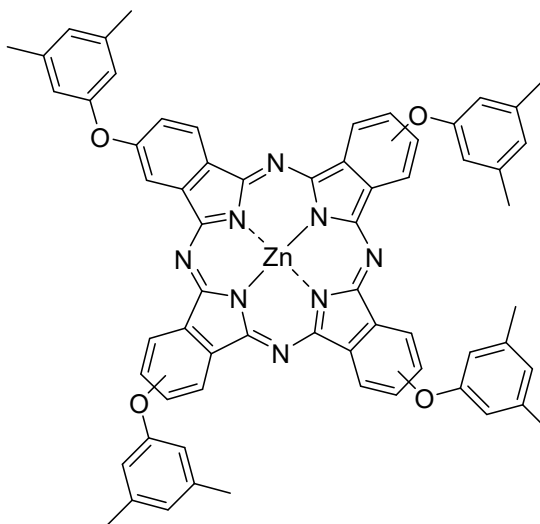

Purification of the crude was carried out by short pad filtration on silica gel, using THF for sample loading and a 3:1 hexane:THF mixture as the eluent. The target compound was obtained as a blue solid in 48% yield.  $^1\text{H}$  NMR (600 MHz,  $\text{THF-}d_8$ ):  $\delta$  = 9.01 – 8.91 (m, 4H), 8.65 – 8.60 (m, 4H), 7.72 – 7.70 (m, 4H), 7.12 – 6.93 (m, 12H), 2.44 – 2.41 (m, 24H,  $\text{CH}_3$ ) ppm;  $^{13}\text{C}$  NMR (150 MHz,  $\text{THF-}d_8$ ):  $\delta$  = 160.62, 160.58, 160.54, 160.48, 160.40, 160.37, 158.99, 158.93, 158.89, 158.84, 158.81, 141.28, 141.24, 141.23, 141.19, 140.88, 140.86, 140.82, 140.80, 134.43, 134.33, 134.27, 126.59, 126.57, 126.53, 126.51, 126.49, 126.42, 126.41, 124.89, 124.74, 124.71, 121.38, 121.34, 118.49, 118.47, 118.39, 118.37, 118.36, 118.26, 118.23, 112.92, 112.87, 112.83, 21.75 ppm. FT-IR:  $\nu$  = 2918, 2849, 2828, 1611, 1584, 1456, 1393, 1335, 1292, 1256, 1217, 1173, 1134, 1084, 1043, 1022, 951, 999, 820, 559, 534  $\text{cm}^{-1}$ . UV-vis (THF):  $\lambda_{\text{max}}$  = 675, 352 nm. MALDI-TOF  $[\text{M}]^{*+}$ :  $m/z$  = 1056.41, (Calcd: 1056.31).

**Tetra-(p-tolyloxy)-zinc-phthalocyanine (2).**

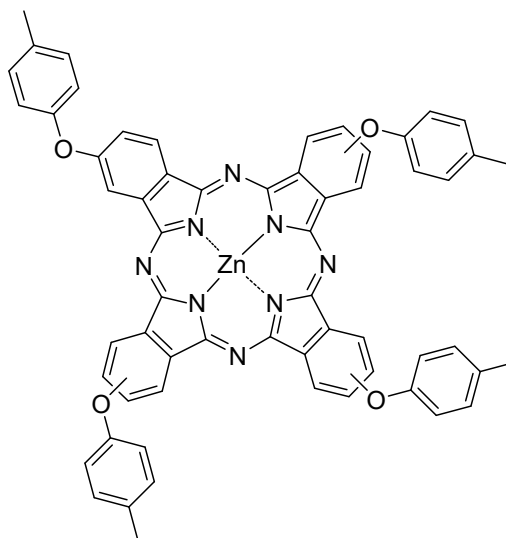

Purification of the crude was carried out by short pad filtration on silica gel, using THF for sample loading and a 3:1 hexane:THF mixture as the eluent. The target compound was obtained as a blue solid in 43% yield.  $^1\text{H}$  NMR (600 MHz,  $\text{THF}-d_8$ ):  $\delta$  = 8.94 – 8.77 (m, 4H), 8.64 – 8.50 (m, 4H) 7.69 – 7.61 (m, 4H), 7.45 – 7.35 (m, 16H), 2.49 – 2.47 (m, 12H) ppm;  $^{13}\text{C}$  NMR (150 MHz,  $\text{THF}-d_8$ ):  $\delta$  = 160.70, 160.66, 160.62, 160.54, 156.60, 156.58, 156.51, 156.44, 156.38, 156.34, 153.49, 152.46, 141.14, 141.08, 141.06, 134.47, 134.45, 134.31, 134.30, 134.24, 134.22, 134.08, 134.03, 134.00, 131.61, 131.54, 124.87, 124.84, 124.64, 124.59, 120.92, 120.88, 120.81, 120.77, 120.71, 120.68, 120.60, 120.57, 112.47, 112.38, 112.32, 111.95, 111.87, 111.78, 21.17 ppm. FT-IR:  $\nu$  = 3024, 2922, 2860, 1602, 1504, 1472, 1393, 1335, 1259, 1227, 1205, 1161, 1115, 1086, 1043, 1016, 945, 889, 868, 816, 743, 668, 498  $\text{cm}^{-1}$ . UV-vis (THF):  $\lambda_{\text{max}}$  = 675, 352 nm. MALDI-TOF  $[\text{M}]^{+}$ :  $m/z$  = 1000.37, (Calcd: 1000.25).

**Tetra-(4-iodo-2,6-dimethylphenoxy)-zinc-phthalocyanine (3).**

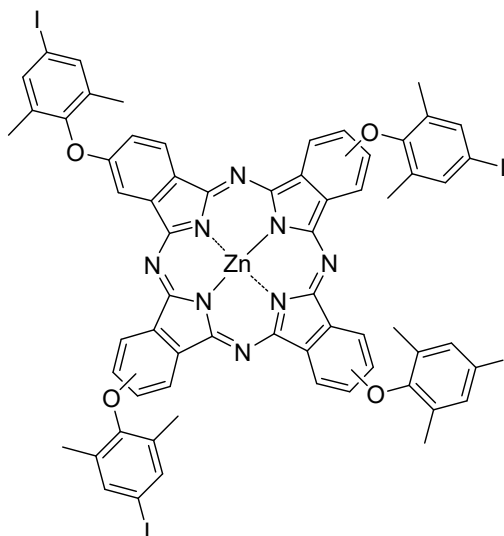

Purification of the crude was performed by short pad filtration on silica gel, using THF for sample loading and a gradient elution with increasing polarity (from 4:1 to 1:1 petroleum ether:THF). The target compound was obtained as a blue solid in 37% yield.  $^1\text{H}$  NMR (600 MHz,  $\text{Pyr-}d_5$ )  $\delta$  = 9.36 – 9.68 (m, 4H), 8.87 – 9.19 (m, 4H), 7.74 (m, 4H), 7.60 – 7.67 (m, 8H), 2.19 (m, 24H) ppm;  $^{13}\text{C}$  NMR (150 MHz,  $\text{Pyr-}d_5$ ):  $\delta$  = 159.92, 159.75, 159.60, 151.66, 151.64, 151.54, 151.54, 151.50, 142.92, 142.92, 138.41, 138.39, 138.35, 134.18, 134.18, 125.68, 125.68, 117.55, 117.49, 117.02, 116.88, 114.87, 114.86, 90.73, 90.71, 90.70, 90.64, 90.61, 79.53, 79.09, 34.77, 34.71, 30.55, 30.24, 29.34, 24.15, 24.15, 21.15, 16.53, 16.50, 15.99, 15.96, 15.96 ppm. FT-IR:  $\nu$  = 2926, 2850, 1607, 1460, 1392, 1337, 1268, 1213, 1179, 1115, 1084, 1038, 944, 852, 813, 764, 743  $\text{cm}^{-1}$ . UV-vis (THF):  $\lambda_{\text{max}}$  = 677, 351 nm. MALDI-TOF  $[\text{M}]^{*+}$ :  $m/z$  = 1559.83, (Calcd: 1559.90).

***Tert*-butyl(4-hydroxyphenyl)carbamate (4a).**

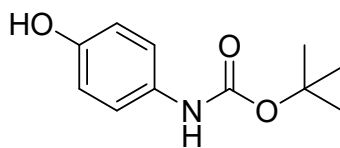

$^1\text{H}$  NMR (600 MHz,  $\text{CDCl}_3$ ):  $\delta$  = 7.17 – 7.16 (m, 2H), 6.74 – 6.73 (m, 2H), 6.35 (bs, 1H), 5.33 (bs, 1H), 1.51 (s, 9H) ppm;  $^{13}\text{C}$  NMR (150 MHz,  $\text{CDCl}_3$ ):  $\delta$  = 153.56, 152.04, 130.99, 121.4, 115.74, 80.46, 28.38.

**Phthalocyanine (4).**

Purification of the crude by Soxhlet extraction with methanol gave a phthalocyanine-based product as a green solid. FT-IR:  $\nu$  = 3309, 2930, 2860, 1721, 1593, 1484, 1466, 1395, 1362, 1333, 1314, 1267, 1220, 1112, 1092, 1041, 1007, 946, 885, 832, 743, 724, 696  $\text{cm}^{-1}$ . UV-vis (Pyridine):  $\lambda_{\text{max}}$  = 685, 355 nm.



**Tetra-(3,5-bis(trifluoromethyl)phenoxy)-zinc-phthalocyanine (5).**

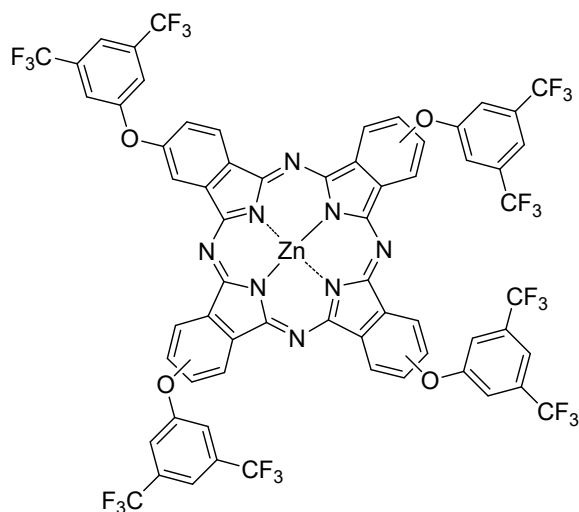

Purification of the crude was performed by short pad filtration on silica gel, using a 5:3 hexane:ethyl acetate mixture for both sample loading and elution. The target compound was obtained as a blue solid in 27% yield.  $^1\text{H}$  NMR (600 MHz,  $\text{THF-}d_8$ ):  $\delta$  = 9.17 – 9.06 (m, 4H), 8.80-8.75 (m, 4H), 8.05-7.84 (m, 16H) ppm;  $^{13}\text{C}$  NMR (150 MHz,  $\text{THF-}d_8$ ):  $\delta$  = 160.59, 160.57, 160.54, 157.96, 157.94, 157.86, 157.78, 157.76, 141.32, 141.29, 141.25, 141.20, 141.18, 141.13, 135.94, 135.92, 135.86, 135.84, 134.67, 134.65, 134.63, 134.61, 134.45, 134.43, 134.41, 134.39, 134.32, 125.52, 125.49, 125.46, 124.44 (q,  $\text{CF}_3$ ,  $J$  = 272 Hz), 122.21, 122.17, 119.88, 119.84, 119.81, 118.07, 118.02, 117.96, 117.93, 117.91, 117.85, 114.43, 114.40, 114.37, 114.33 ppm. FT-IR:  $\nu$  = 1607, 1487, 1460, 1337, 1275, 1231, 1171, 1125, 1105, 1084, 1045, 961, 945, 914, 885, 847, 735, 700, 681, 617, 449, 436  $\text{cm}^{-1}$ . UV-vis (THF):  $\lambda_{\text{max}}$  = 670, 349 nm. MALDI-TOF  $[\text{M}]^+$ :  $m/z$  = 1488.20, (Calcd: 1488.08).

**Tetra-(2-dimethylaminoethoxy)-zinc-phthalocyanine (6).**

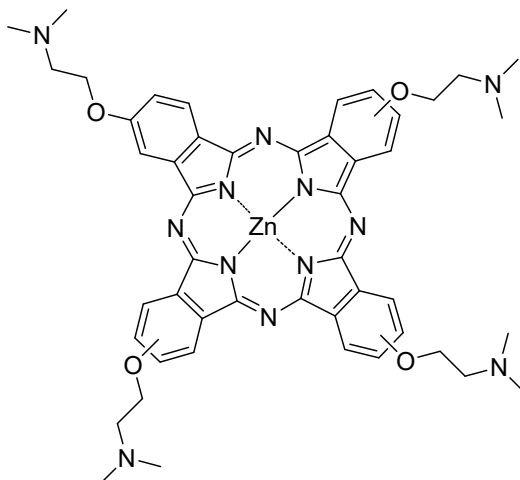

Purification of the crude by several washings with a 3:1 water:methanol mixture gave the target product in 49% yield as a green solid.  $^1\text{H}$  NMR (600 MHz,  $\text{Pyr-}d_5$ )  $\delta$  = 9.56 (m, 4H), 9.30 (d,  $J$  = 8.1 Hz, 4H), 7.84 – 7.92 (m, 4H), 4.56 (m, 8H), 2.92 (m, 8H), 2.40 (s, 12H), 2.35 (s, 12H) ppm;  $^{13}\text{C}$  NMR (150 MHz,  $\text{Pyr-}d_5$ ):  $\delta$  = 161.49, 161.27, 153.54, 141.12, 132.08, 132.06, 118.67, 118.63, 115.87, 113.99, 112.54, 108.54, 106.59, 106.52, 67.47, 67.45, 67.37, 67.35, 58.56, 58.52, 57.95, 57.88, 45.90, 45.84, 45.63, 45.50, 37.20, 29.79, 29.75, 23.49, 23.45 ppm. FT-IR:  $\nu$  = 2935, 2859, 2830, 2781, 2370, 2322, 2212, 1606, 1508, 1488, 1456, 1436, 1388, 1337, 1278, 1229, 1112, 1089, 1040, 952, 836, 827, 770, 746, 727  $\text{cm}^{-1}$ . UV-vis (THF):  $\lambda_{\text{max}}$  = 677, 351 nm. MALDI-TOF  $[\text{M}]^{*+}$ :  $m/z$  = 924.32, (Calcd: 924.35).

**Tetra-(hexyloxy)-zinc-phthalocyanine (7).**

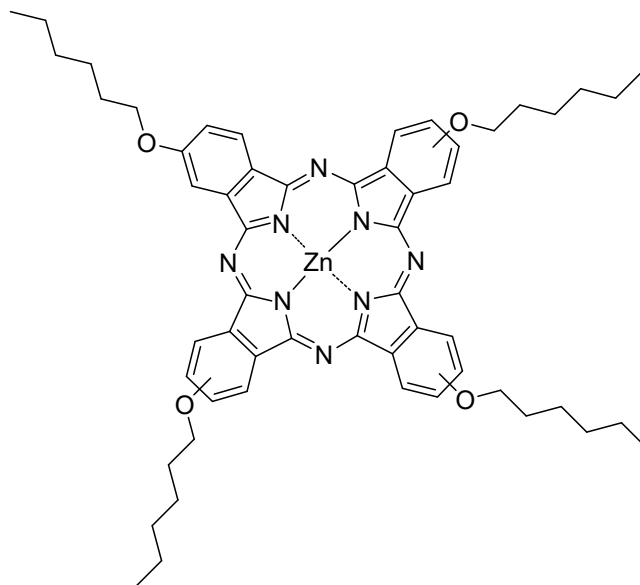

Purification of the crude was carried out by short pad filtration on silica gel, using THF for sample loading and a 2:1 hexane:THF mixture as the eluent. The target compound was obtained as a blue solid in 22% yield.  $^1\text{H}$  NMR (600 MHz,  $\text{THF-}d_8$ ):  $\delta$  = 8.98 – 8.88 (m, 4H), 8.55 – 8.51 (m, 4H), 7.57 – 7.49 (m, 4H), 4.49 (bs, 8H), 2.14 – 2.09 (m, 8H), 1.82 – 1.78 (m, 8H), 1.61 – 1.53 (m, 16H), 1.08 – 1.04 (m, 12H) ppm;  $^{13}\text{C}$  NMR (150 MHz,  $\text{THF-}d_8$ ):  $\delta$  = 161.94, 132.52, 125.90, 124.03, 69.41, 32.87, 30.74, 27.05, 23.73, 14.55 ppm. FT-IR:  $\nu$  = 2954, 2925, 2859, 2361, 2341, 2321, 1603, 1495, 1460, 1384, 1335, 1277, 1228, 1112, 1083, 1046, 946, 874, 846, 818, 770, 746, 726, 658  $\text{cm}^{-1}$ . UV-vis (THF):  $\lambda_{\text{max}}$  = 676, 349 nm. MALDI-TOF  $[\text{M}+\text{H}]^+$ :  $m/z$  = 977.522, (Calcd: 976.43).

**Octakis(3,5-dimethylphenoxy)-zinc-phthalocyanine (8).**

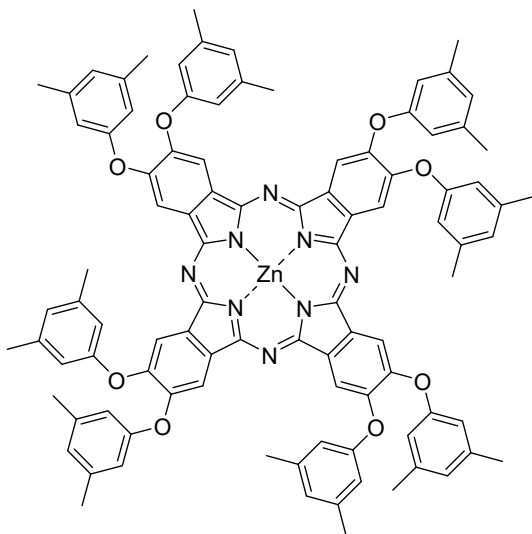

Purification of the crude was carried out by short pad filtration on silica gel, using THF for sample loading and a 2:1 petroleum ether:THF mixture as the eluent. The target compound was obtained as a green solid in 30% yield.  $^1\text{H}$  NMR (600 MHz,  $\text{THF-}d_8$ ): 8.75 (s, 8H), 6.89 (s, 16H), 6.79 (m, 8H), 2.31 (s, 48H) ppm;  $^{13}\text{C}$  NMR (150 MHz,  $\text{THF-}d_8$ ): 159.03, 151.29, 140.23, 135.58, 125.80, 116.82, 115.53, 21.58 ppm. FT-IR:  $\nu = 3011, 2918, 2853, 1614, 1587, 1445, 1396, 1389, 1261, 1177, 1132, 1086, 1038, 1022, 947, 868, 833, 744, 723, 683\text{ cm}^{-1}$ . UV-vis (THF):  $\lambda_{\text{max}} = 679, 357\text{ nm}$ . MALDI-TOF  $[\text{M}+\text{H}]^+$ :  $m/z = 1536.639$ , (Calcd: 1539.124).

**Octakis(p-tolyloxy)-zinc-phthalocyanine (9).**

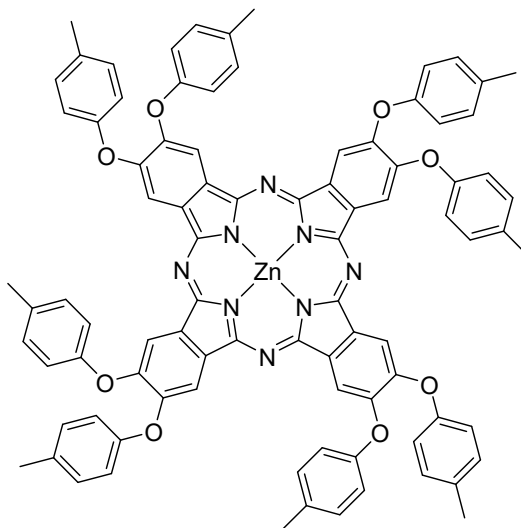

Purification of the crude was performed by short pad filtration on silica gel, using THF for sample loading and gradient elution with increasing polarity, from 7:1 to 3:1 to 2:1 petroleum ether:THF. The target compound was obtained as a green solid in 31% yield.  $^1\text{H}$  NMR (600 MHz,  $\text{THF-}d_8$ ): 8.72 (s, 8H), 7.20 – 7.17 (m, 32H), 2.35 (s, 24H) ppm;  $^{13}\text{C}$  NMR (150 MHz,  $\text{THF-}d_8$ ): 156.95, 152.86, 151.27, 135.53, 133.41, 131.15, 119.06, 115.28, 21.05. FT-IR:  $\nu$  = 3028, 2918, 2855, 1605, 1504, 1485, 1447, 1398, 1337, 1265, 1202, 1173, 1138, 1090, 1028, 953, 890, 860, 810, 725, 698, 486, 473  $\text{cm}^{-1}$ . UV-vis (THF):  $\lambda_{\text{max}}$  = 676, 356 nm. MALDI-TOF  $[\text{M}+\text{H}]^+$ :  $m/z$  = 1425.052, (Calcd: 1426.908).

**$^1\text{H}$  NMR spectrum of tetra-(3,5-dimethylphenoxy)-zinc-phthalocyanine (1) in  $\text{THF-}d_8$ .**

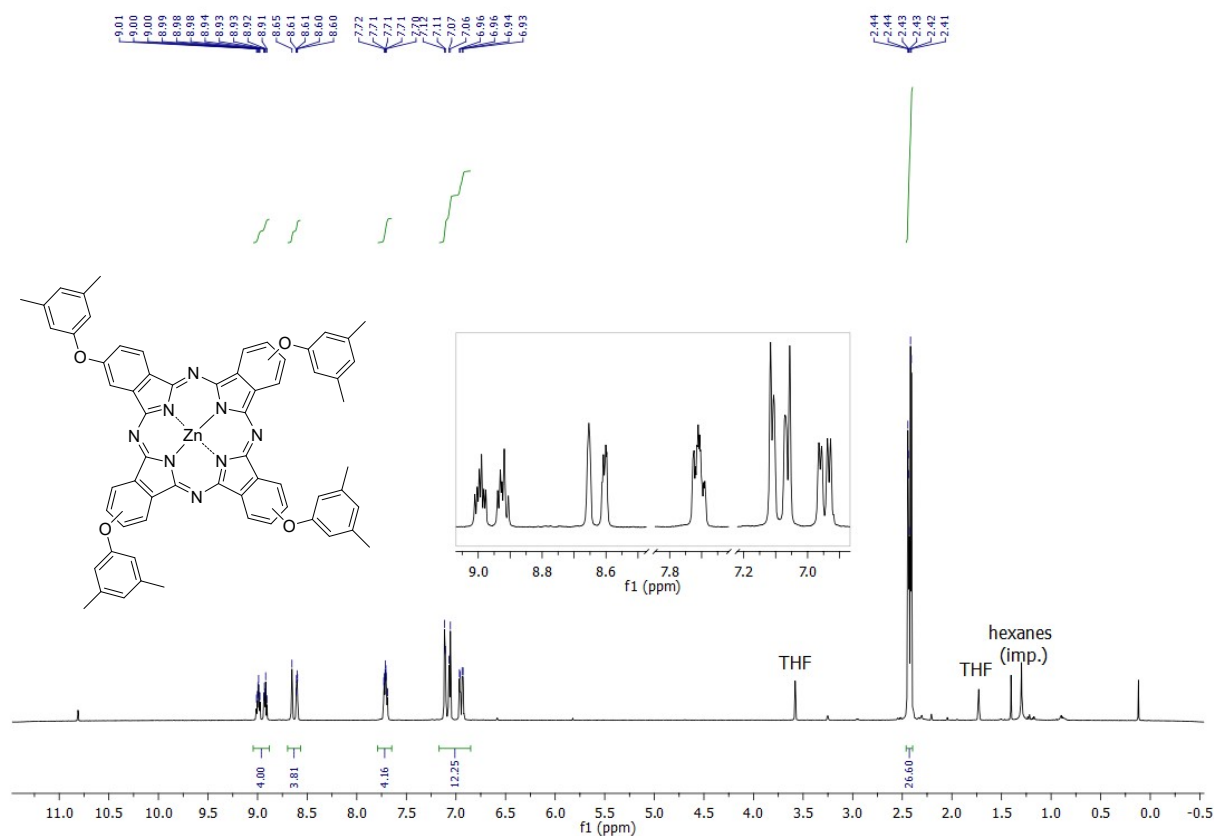

**$^{13}\text{C}$  NMR spectrum of tetra-(3,5-dimethylphenoxy)-zinc-phthalocyanine (1) in  $\text{THF-}d_8$ .**

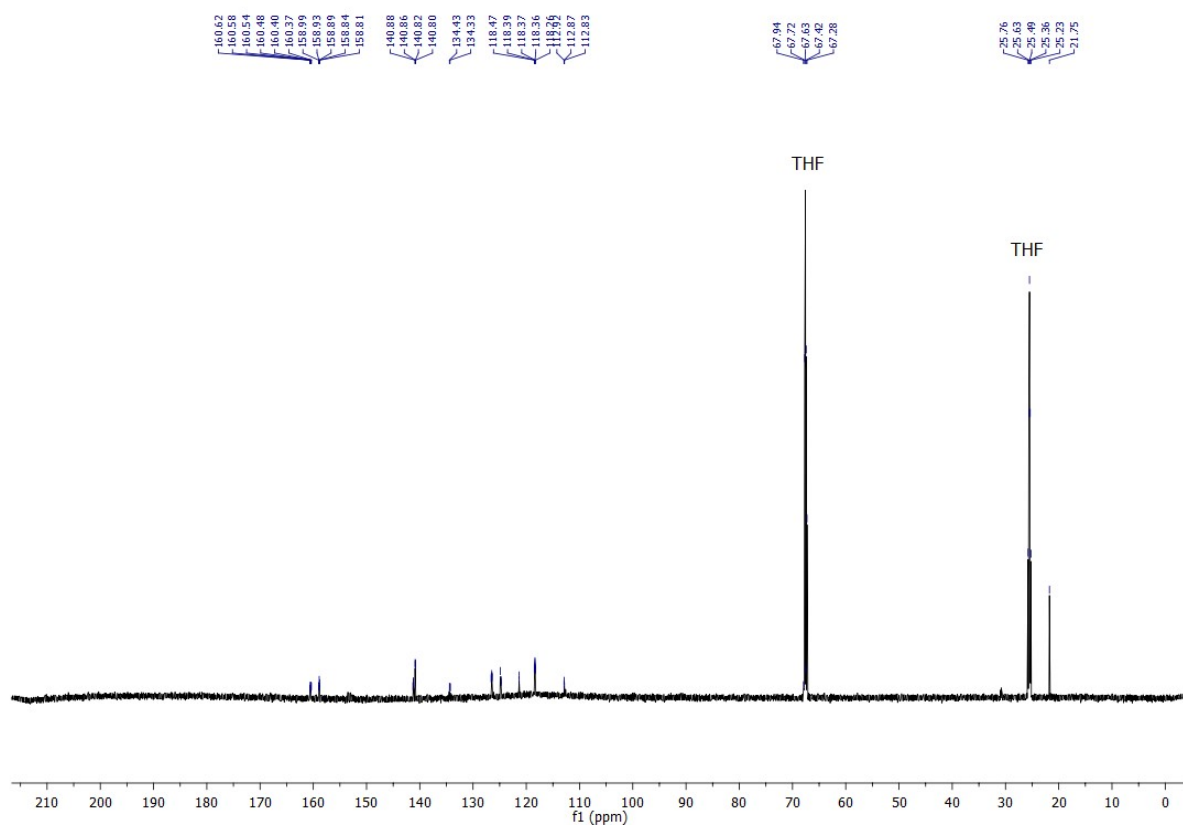

**Chemical structure of compound 1:** c1ccc(Oc2c3c4c5c6c7c8c9c10c11c12c13c14c15c16c17c18c19c20c21c22c23c24c25c26c27c28c29c30c31c32c33c34c35c36c37c38c39c40c41c42c43c44c45c46c47c48c49c50c51c52c53c54c55c56c57c58c59c60c61c62c63c64c65c66c67c68c69c70c71c72c73c74c75c76c77c78c79c80c81c82c83c84c85c86c87c88c89c90c91c92c93c94c95c96c97c98c99c100c101c102c103c104c105c106c107c108c109c110c111c112c113c114c115c116c117c118c119c120c121c122c123c124c125c126c127c128c129c130c131c132c133c134c135c136c137c138c139c140c141c142c143c144c145c146c147c148c149c150c151c152c153c154c155c156c157c158c159c160c161c162c163c164c165c166c167c168c169c170c171c172c173c174c175c176c177c178c179c180c181c182c183c184c185c186c187c188c189c190c191c192c193c194c195c196c197c198c199c200c201c202c203c204c205c206c207c208c209c210c211c212c213c214c215c216c217c218c219c220c221c222c223c224c225c226c227c228c229c230c231c232c233c234c235c236c237c238c239c240c241c242c243c244c245c246c247c248c249c250c251c252c253c254c255c256c257c258c259c260c261c262c263c264c265c266c267c268c269c270c271c272c273c274c275c276c277c278c279c280c281c282c283c284c285c286c287c288c289c290c291c292c293c294c295c296c297c298c299c300c301c302c303c304c305c306c307c308c309c310c311c312c313c314c315c316c317c318c319c320c321c322c323c324c325c326c327c328c329c330c331c332c333c334c335c336c337c338c339c340c341c342c343c344c345c346c347c348c349c350c351c352c353c354c355c356c357c358c359c360c361c362c363c364c365c366c367c368c369c370c371c372c373c374c375c376c377c378c379c380c381c382c383c384c385c386c387c388c389c390c391c392c393c394c395c396c397c398c399c400c401c402c403c404c405c406c407c408c409c410c411c412c413c414c415c416c417c418c419c420c421c422c423c424c425c426c427c428c429c430c431c432c433c434c435c436c437c438c439c440c441c442c443c444c445c446c447c448c449c450c451c452c453c454c455c456c457c458c459c460c461c462c463c464c465c466c467c468c469c470c471c472c473c474c475c476c477c478c479c480c481c482c483c484c485c486c487c488c489c490c491c492c493c494c495c496c497c498c499c500c501c502c503c504c505c506c507c508c509c510c511c512c513c514c515c516c517c518c519c520c521c522c523c524c525c526c527c528c529c530c531c532c533c534c535c536c537c538c539c540c541c542c543c544c545c546c547c548c549c550c551c552c553c554c555c556c557c558c559c560c561c562c563c564c565c566c567c568c569c570c571c572c573c574c575c576c577c578c579c580c581c582c583c584c585c586c587c588c589c590c591c592c593c594c595c596c597c598c599c600c601c602c603c604c605c606c607c608c609c610c611c612c613c614c615c616c617c618c619c620c621c622c623c624c625c626c627c628c629c630c631c632c633c634c635c636c637c638c639c640c641c642c643c644c645c646c647c648c649c650c651c652c653c654c655c656c657c658c659c660c661c662c663c664c665c666c667c668c669c670c671c672c673c674c675c676c677c678c679c680c681c682c683c684c685c686c687c688c689c690c691c692c693c694c695c696c697c698c699c700c701c702c703c704c705c706c707c708c709c710c711c712c713c714c715c716c717c718c719c720c721c722c723c724c725c726c727c728c729c730c731c732c733c734c735c736c737c738c739c740c741c742c743c744c745c746c747c748c749c750c751c752c753c754c755c756c757c758c759c760c761c762c763c764c765c766c767c768c769c770c771c772c773c774c775c776c777c778c779c780c781c782c783c784c785c786c787c788c789c790c791c792c793c794c795c796c797c798c799c800c801c802c803c804c805c806c807c808c809c810c811c812c813c814c815c816c817c818c819c820c821c822c823c824c825c826c827c828c829c830c831c832c833c834c835c836c837c838c839c840c841c842c843c844c845c846c847c848c849c850c851c852c853c854c855c856c857c858c859c860c861c862c863c864c865c866c867c868c869c870c871c872c873c874c875c876c877c878c879c880c881c882c883c884c885c886c887c888c889c890c891c892c893c894c895c896c897c898c899c900c901c902c903c904c905c906c907c908c909c910c911c912c913c914c915c916c917c918c919c920c921c922c923c924c925c926c927c928c929c930c931c932c933c934c935c936c937c938c939c940c941c942c943c944c945c946c947c948c949c950c951c952c953c954c955c956c957c958c959c960c961c962c963c964c965c966c967c968c969c970c971c972c973c974c975c976c977c978c979c980c981c982c983c984c985c986c987c988c989c990c991c992c993c994c995c996c997c998c999c1000c1001c1002c1003c1004c1005c1006c1007c1008c1009c1010c1011c1012c1013c1014c1015c1016c1017c1018c1019c1020c1021c1022c1023c1

160.70  
160.66  
160.62  
160.54  
156.60  
156.51  
156.44  
156.38  
156.34  
152.46  
141.14  
141.08  
141.06  
134.24  
131.61  
131.54  
120.88  
120.77  
119.47  
119.44  
112.38  
112.32  
111.95  
111.87  
111.78

THF

THF

hexanes (imp.)

21.17

f1 (ppm)

**$^1\text{H}$  NMR spectrum of tetra-(4-iodo-2,6-dimethylphenoxy)-zinc-phthalocyanine (3) in  $\text{Pyr-}d_5$ .**

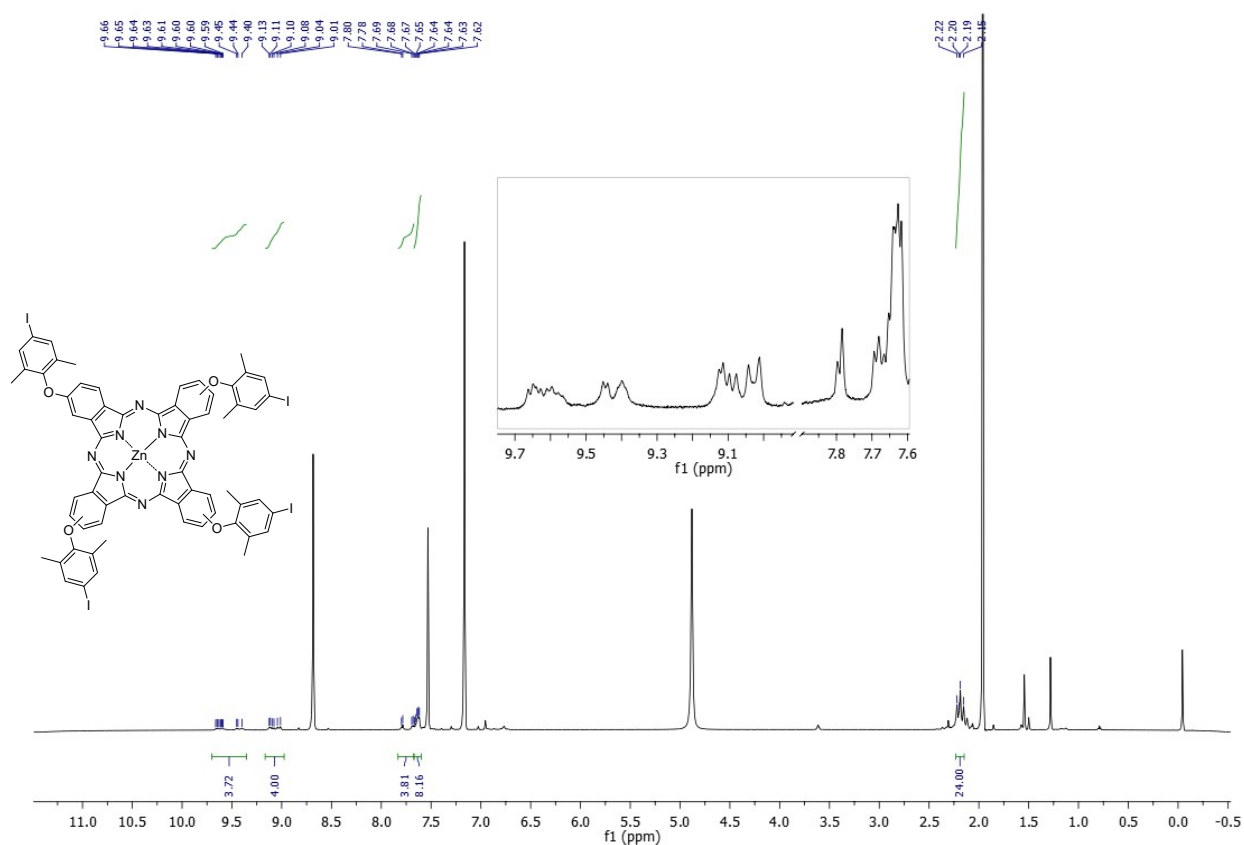

**$^{13}\text{C}$  NMR spectrum of tetra-(4-iodo-2,6-dimethylphenoxy)-zinc-phthalocyanine (3) in  $\text{Pyr-}d_5$ .**

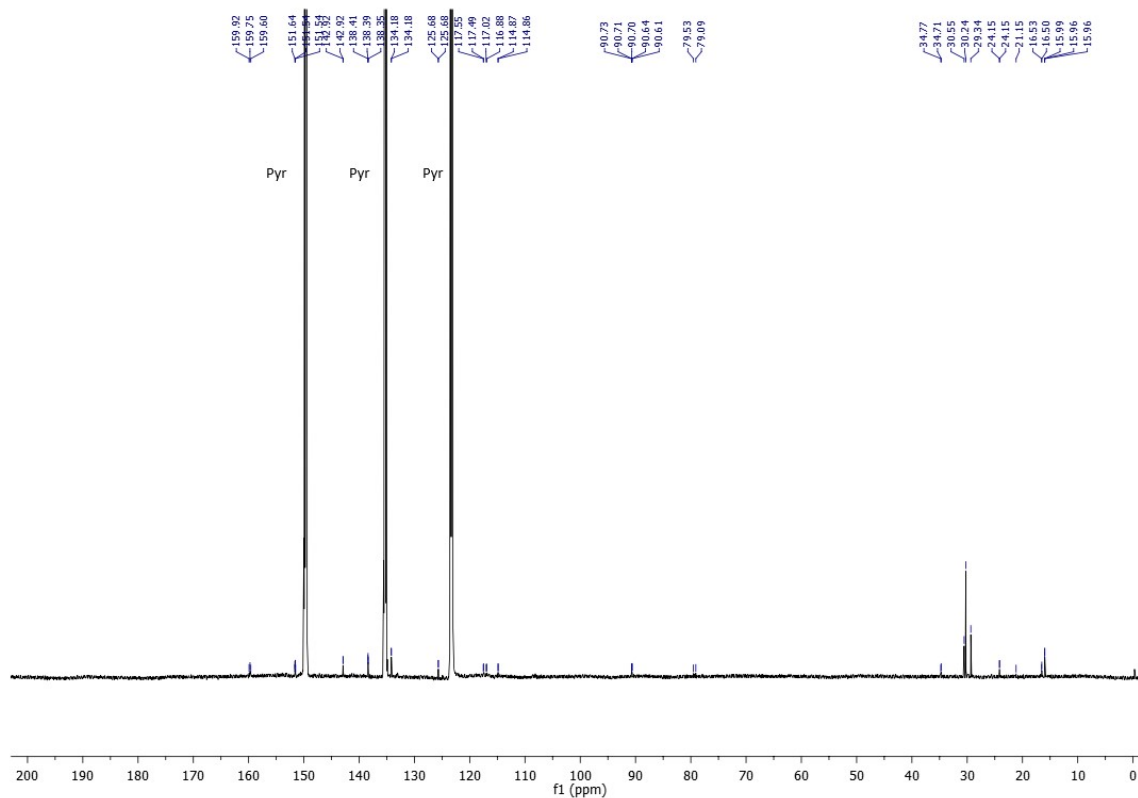



**<sup>1</sup>H NMR spectrum of *tert*-butyl(4-hydroxyphenyl)carbamate (4a) in CDCl<sub>3</sub>.**

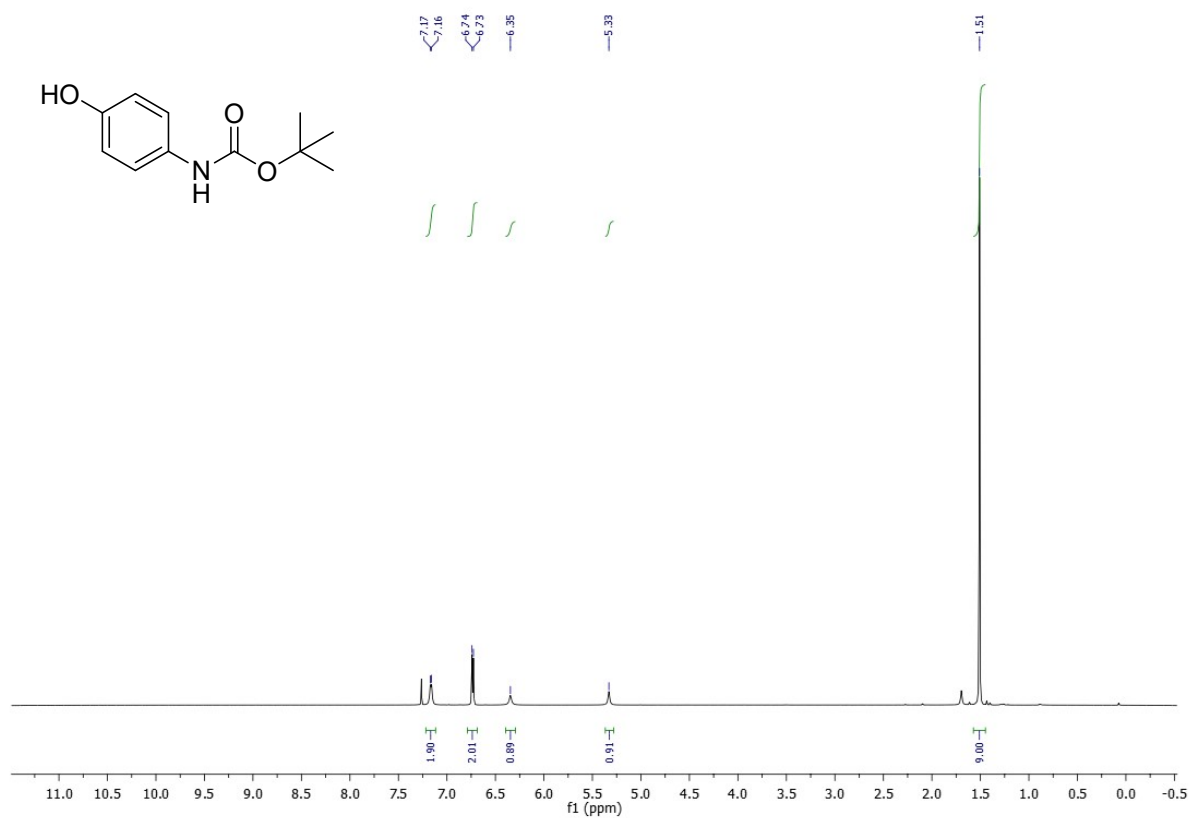

**<sup>13</sup>C NMR spectrum of *tert*-butyl(4-hydroxyphenyl)carbamate (4a) in CDCl<sub>3</sub>.**

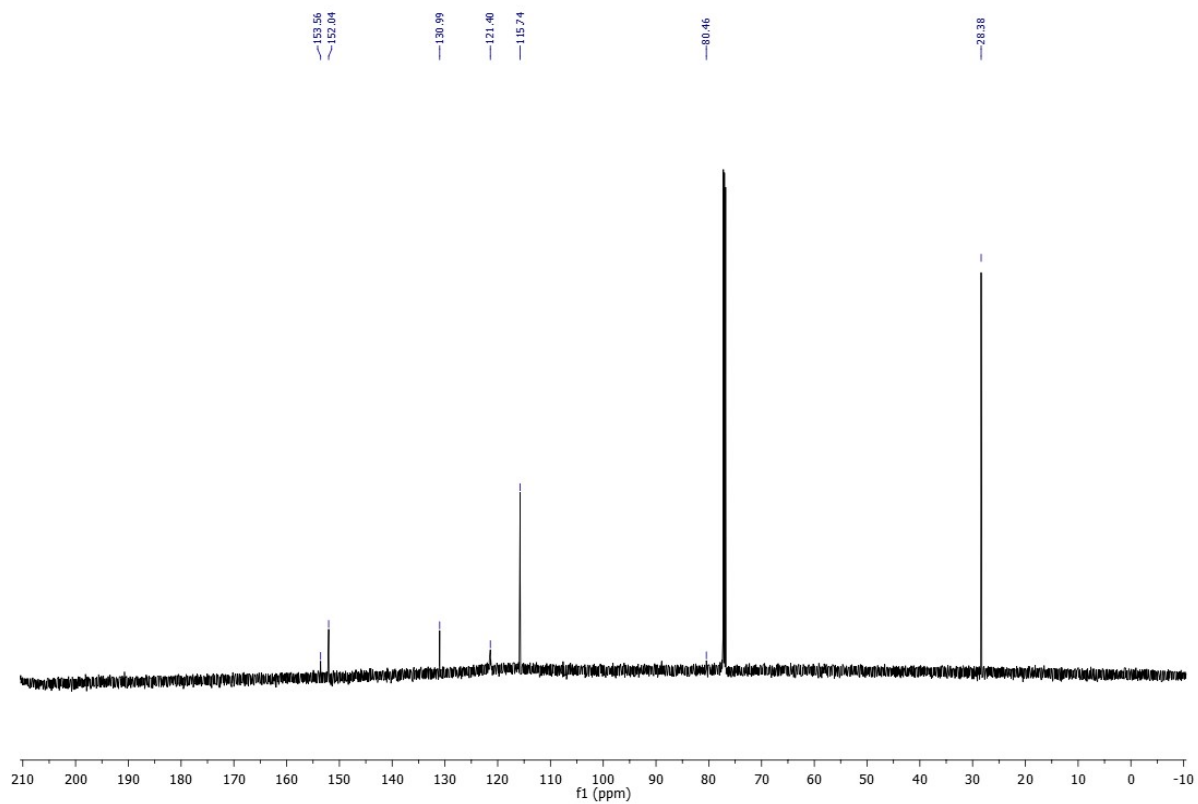

The <sup>1</sup>H NMR spectrum of compound **1** in CDCl<sub>3</sub> is displayed. The main spectrum shows peaks from 0 to 11 ppm. An inset shows the aromatic region from 7.87 to 9.15 ppm. The chemical structure of compound **1** is shown in the top right.

**13C NMR Spectrum (CDCl<sub>3</sub>)**

**Inset: CF<sub>3</sub> signal region (121-128 ppm)**

| Chemical Shift (ppm) | Assignment             |
|----------------------|------------------------|
| 127.16               | CF <sub>3</sub> signal |
| 127.14               | CF <sub>3</sub> signal |
| 125.35               | CF <sub>3</sub> signal |
| 125.32               | CF <sub>3</sub> signal |
| 123.55               | CF <sub>3</sub> signal |
| 123.52               | CF <sub>3</sub> signal |
| 121.73               | CF <sub>3</sub> signal |

**Main Spectrum Peaks:**

- THF (solvent)
- hexanes (imp.)

**$^1\text{H}$  NMR spectrum of tetra-(2-dimethylaminoethoxy)-zinc-phthalocyanine (6) in  $\text{Pyr-}d_5$ .**

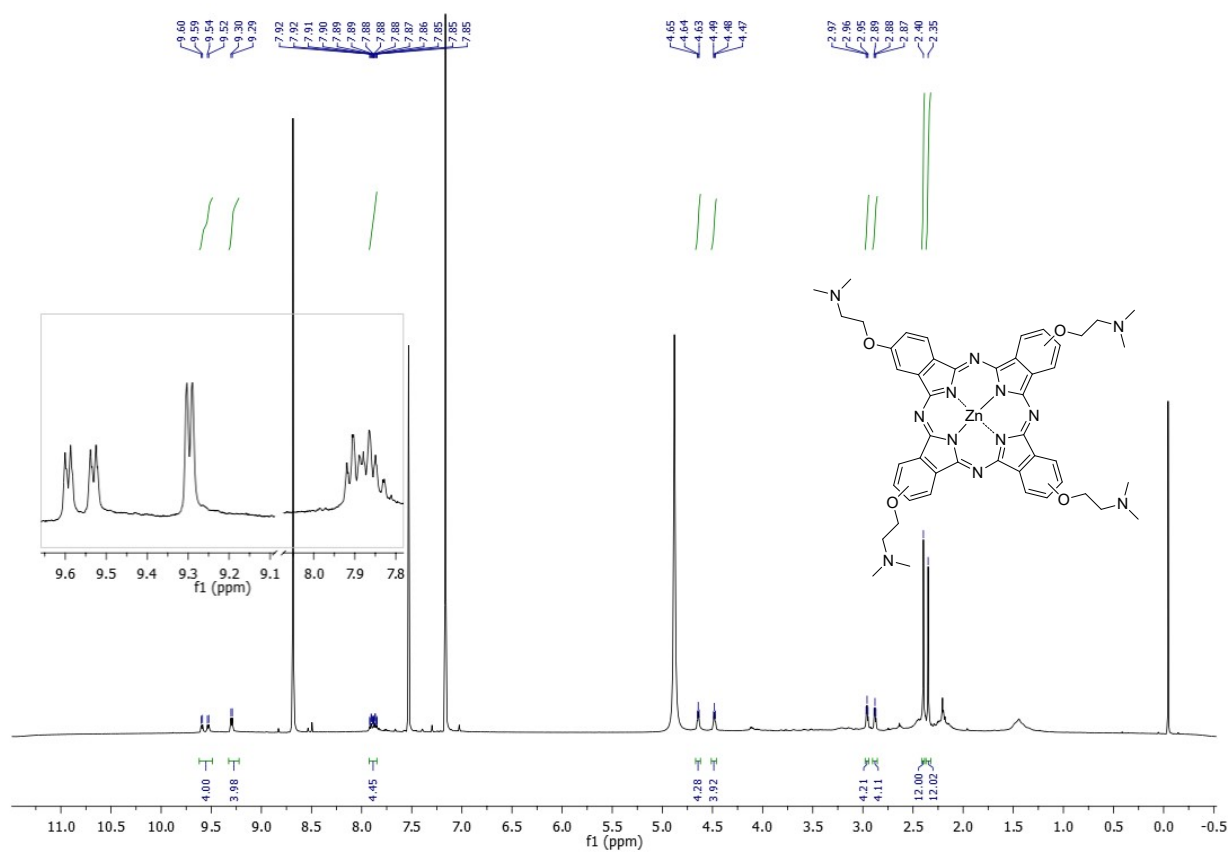

**$^{13}\text{C}$  NMR spectrum of tetra-(2-dimethylaminoethoxy)-zinc-phthalocyanine (6) in  $\text{Pyr-}d_5$ .**

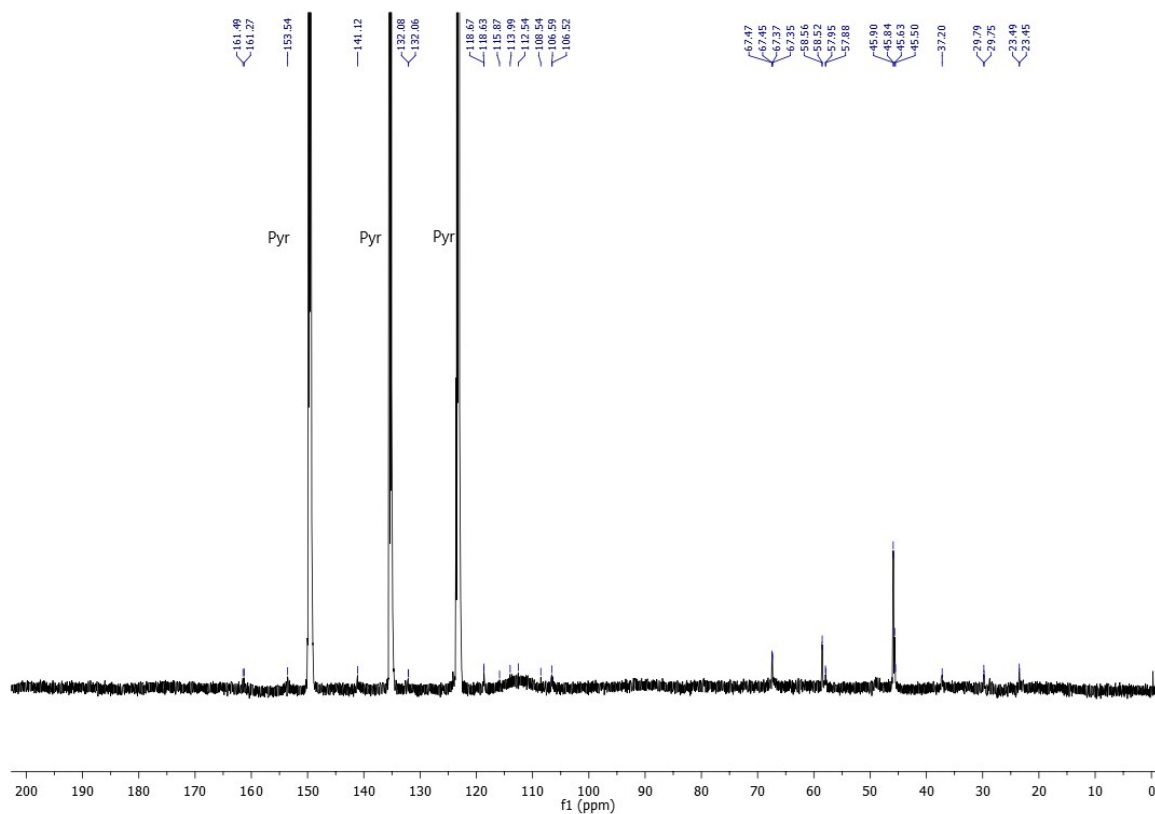

**$^1\text{H}$  NMR spectrum of tetra-(hexyloxy)-zinc-phthalocyanine (7) in  $\text{THF-}d_8$ .**

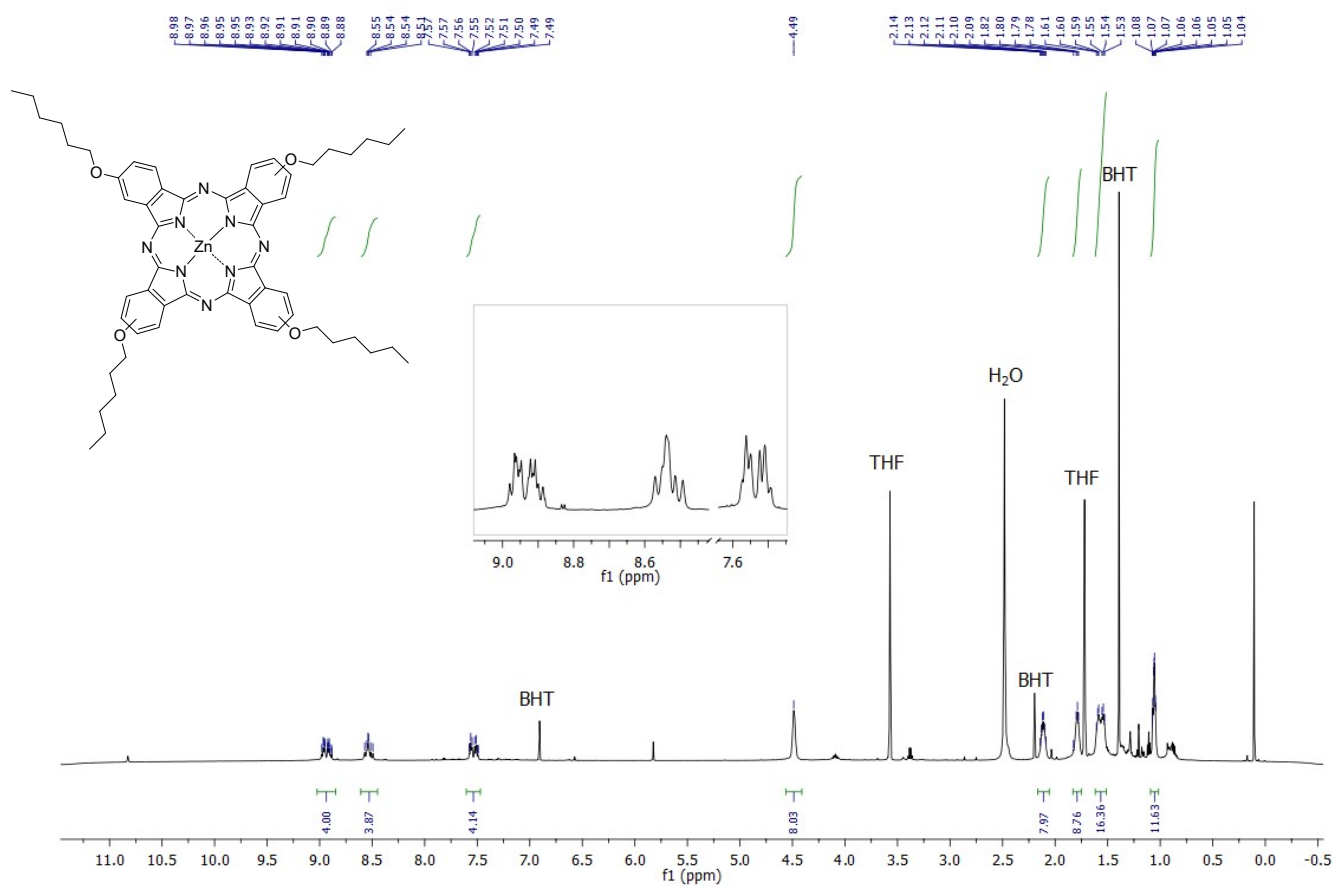

**$^{13}\text{C}$  NMR spectrum of tetra-(hexyloxy)-zinc-phthalocyanine (7) in  $\text{THF-}d_8$ .**

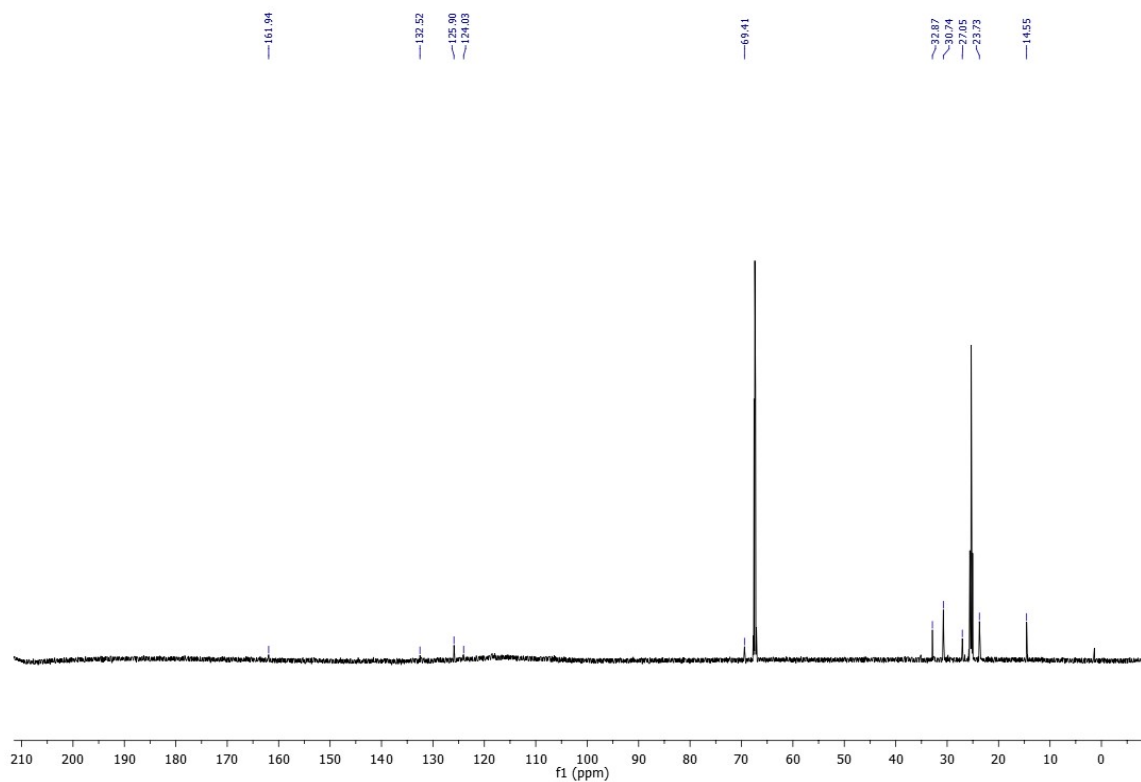

**$^1\text{H}$  NMR spectrum of octakis(3,5-dimethylphenoxy)-zinc-phthalocyanine (8) in  $\text{THF-}d_8$ .**

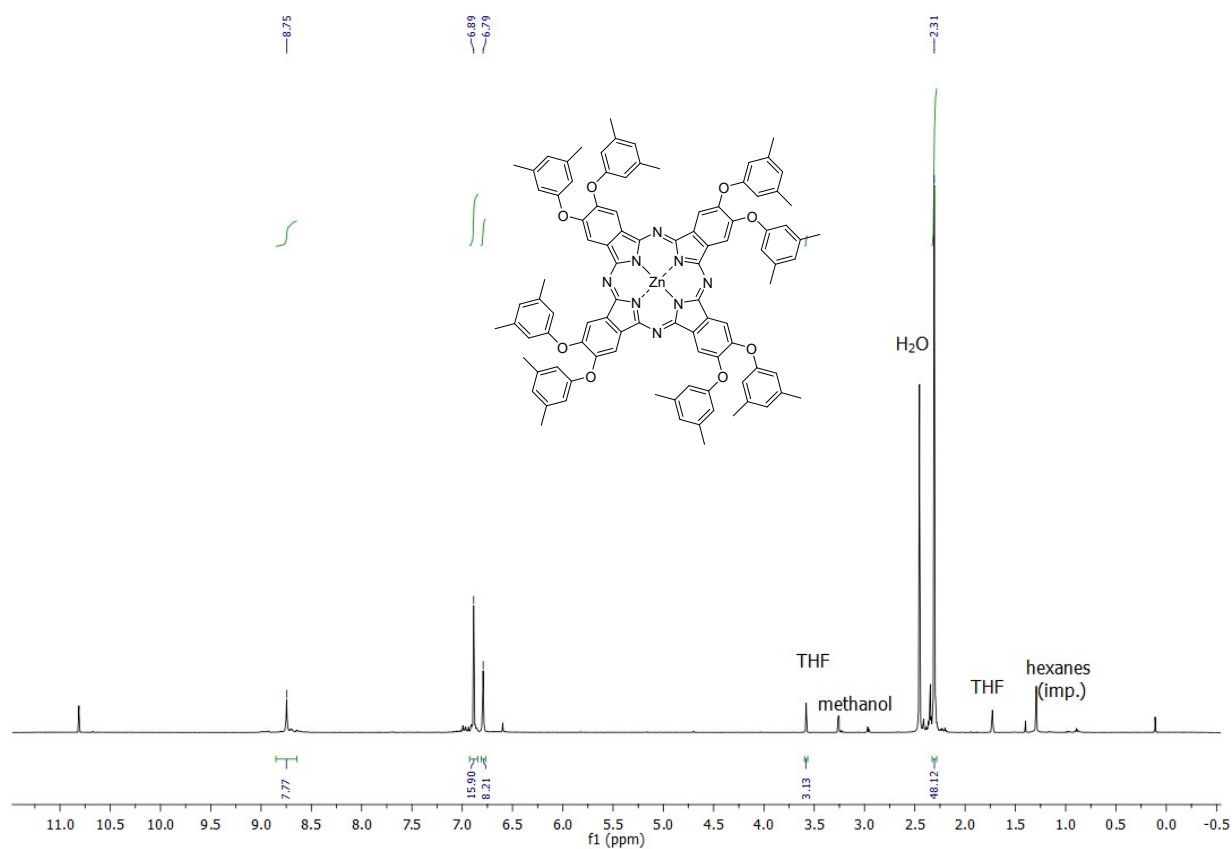

**$^{13}\text{C}$  NMR spectrum of octakis(3,5-dimethylphenoxy)-zinc-phthalocyanine (8) in  $\text{THF-}d_8$ .**

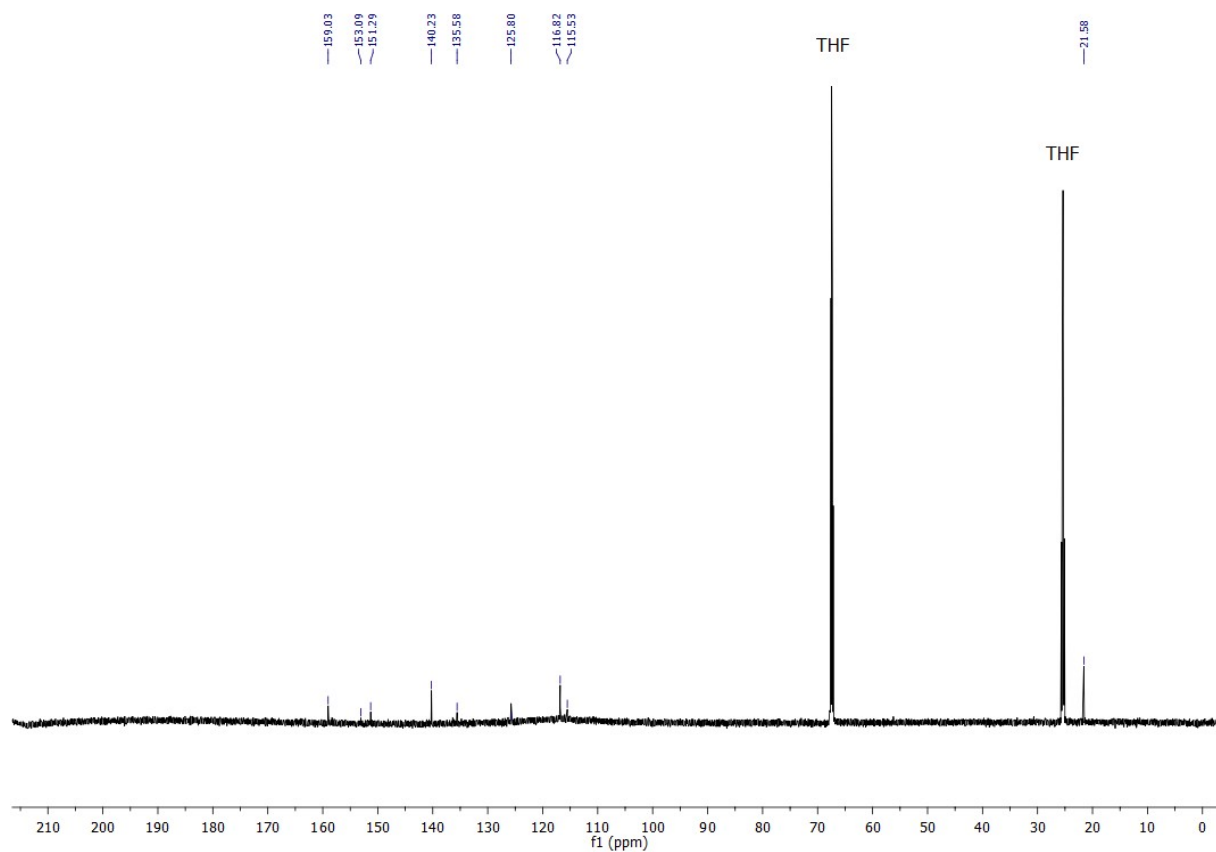

**$^1\text{H}$  NMR spectrum of octakis(p-tolyloxy)-zinc-phthalocyanine (9) in  $\text{THF-}d_8$ .**

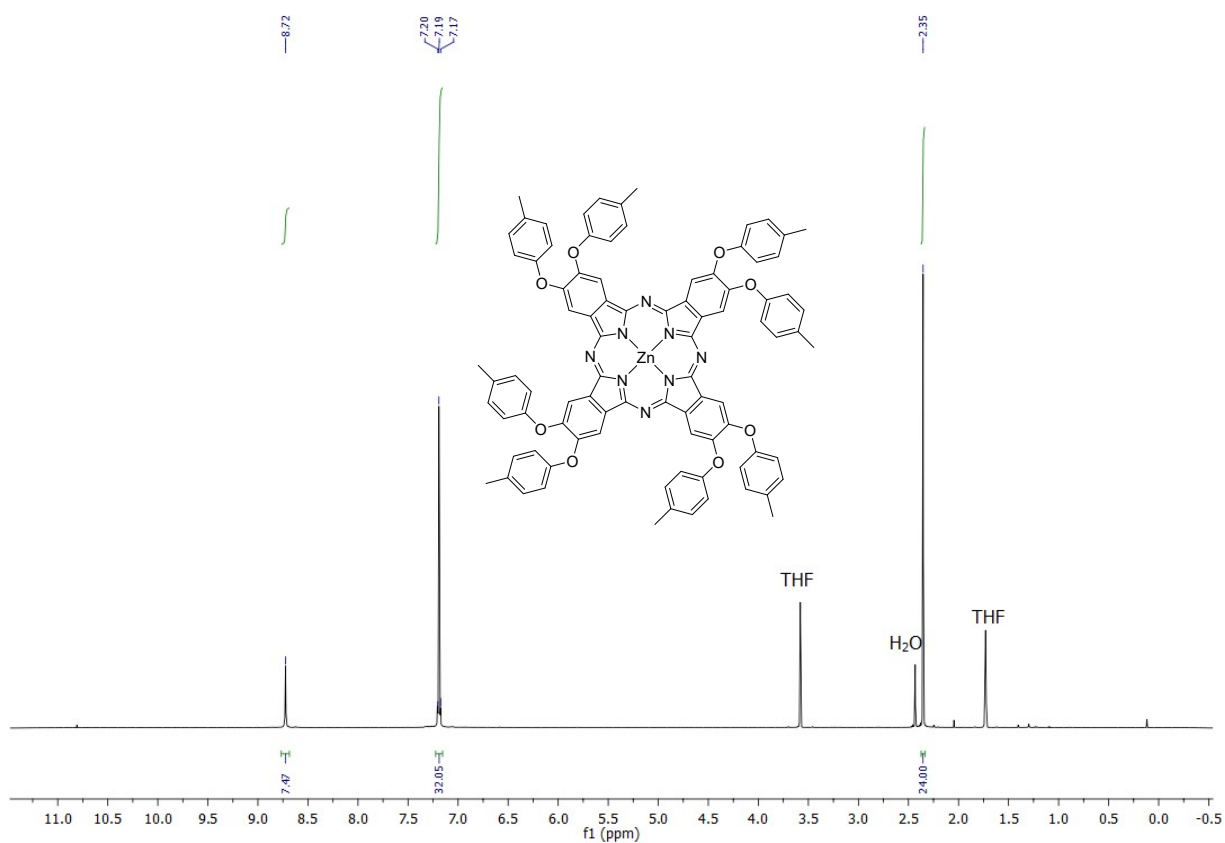

**$^{13}\text{C}$  NMR spectrum of octakis(p-tolyloxy)-zinc-phthalocyanine (9) in  $\text{THF-}d_8$ .**

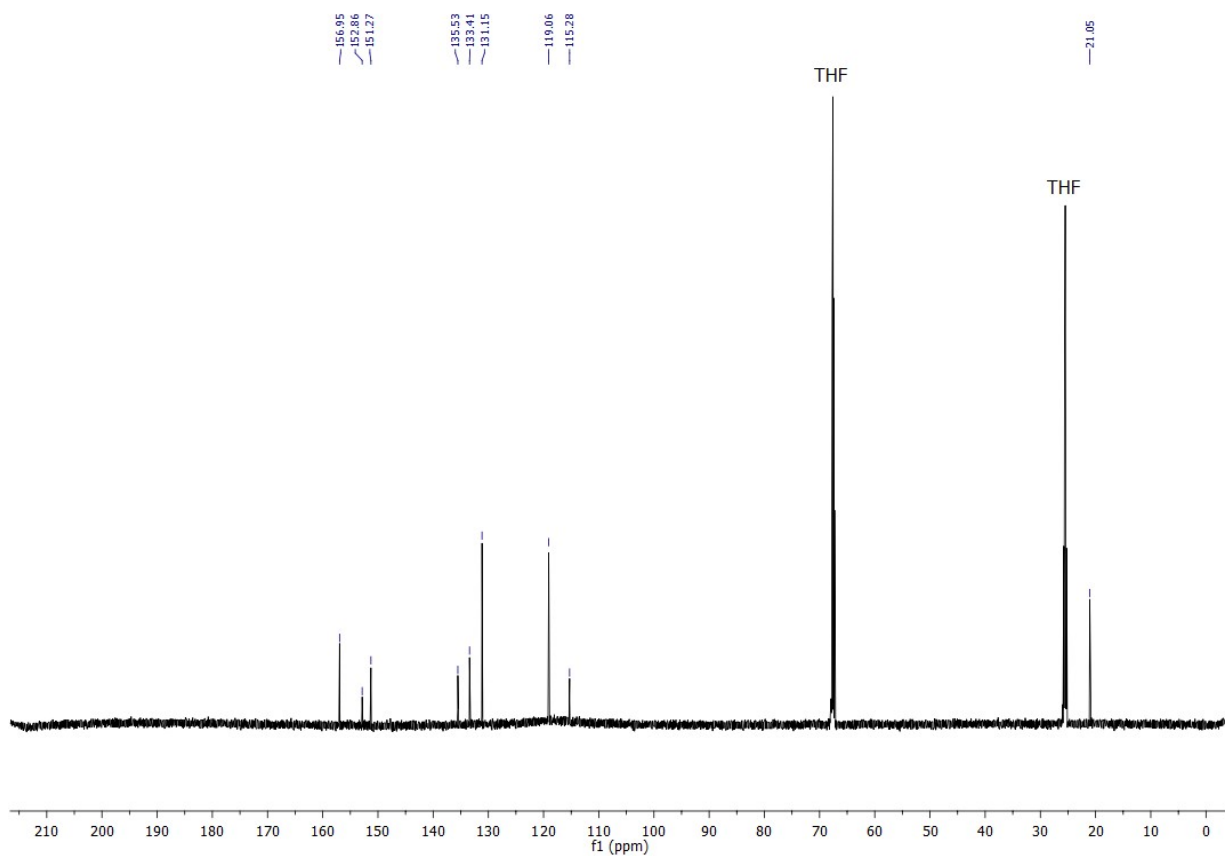

**ATR spectrum of tetra-(3,5-dimethylphenoxy)-zinc-phthalocyanine (1).**

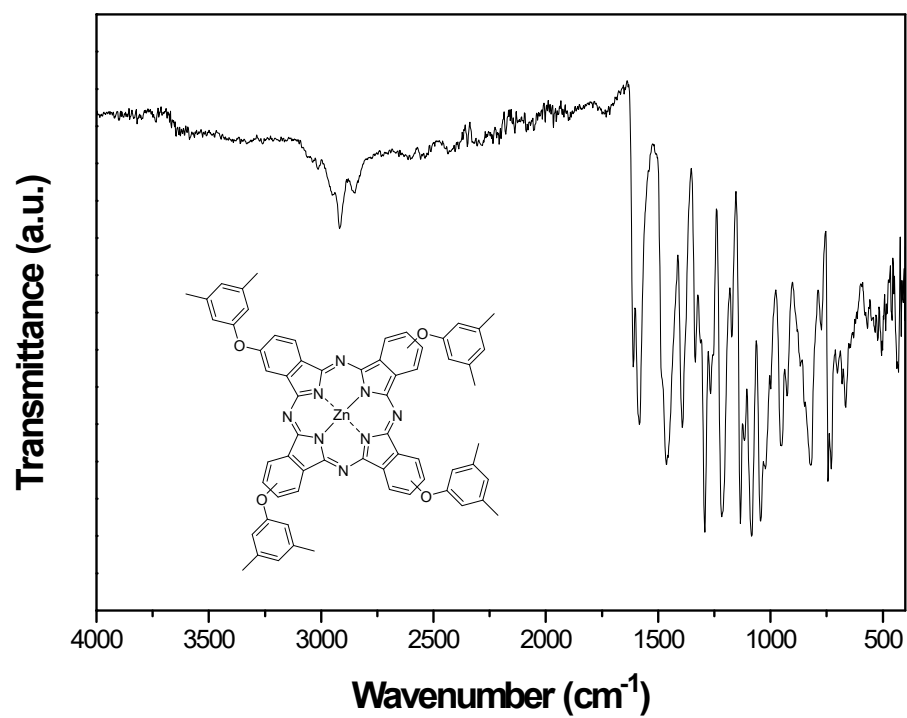

**ATR spectrum of tetra-(p-tolyloxy)-zinc-phthalocyanine (2).**

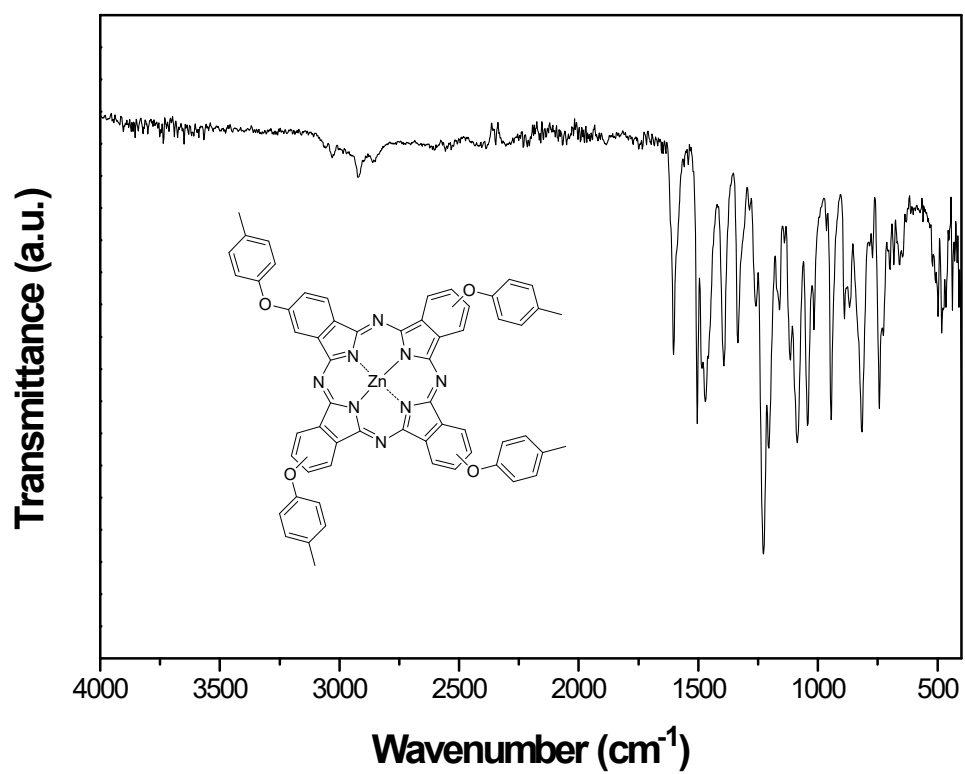

**ATR spectrum of tetra-(4-iodo-2,6-dimethylphenoxy)-zinc-phthalocyanine (3).**

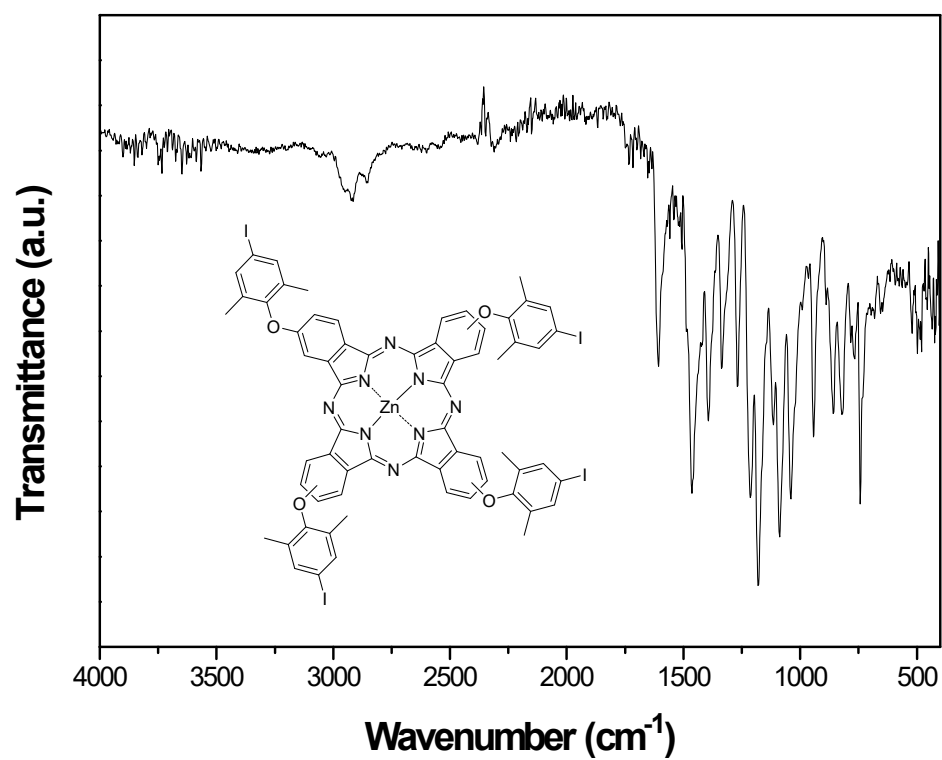

**ATR spectrum of phthalocyanine (4).**

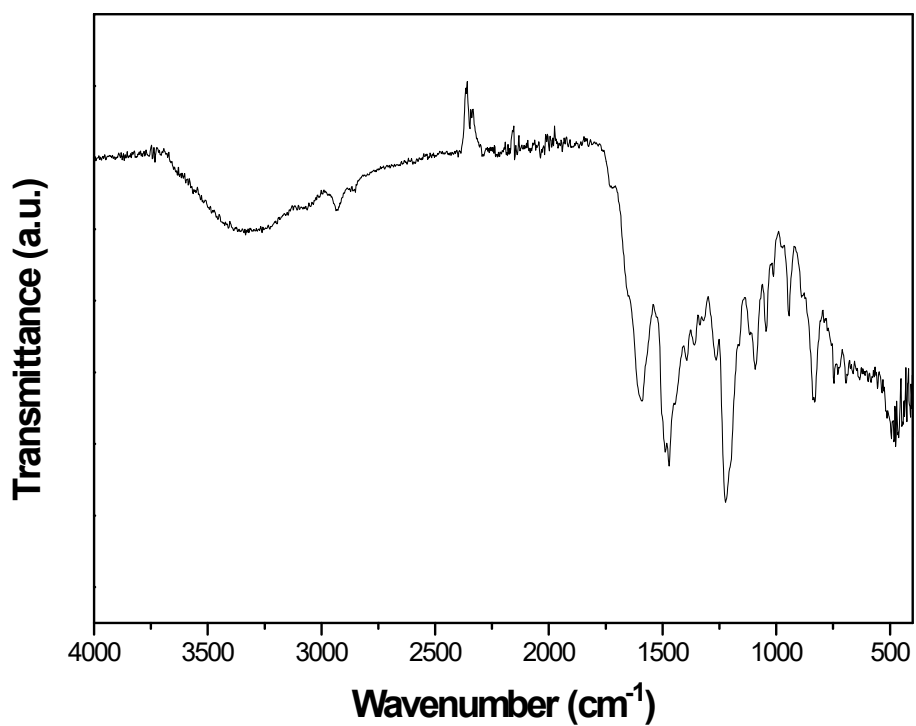



ATR spectrum of tetra-(3,5-bis(trifluoromethyl)phenoxy)-zinc-phthalocyanine (5).

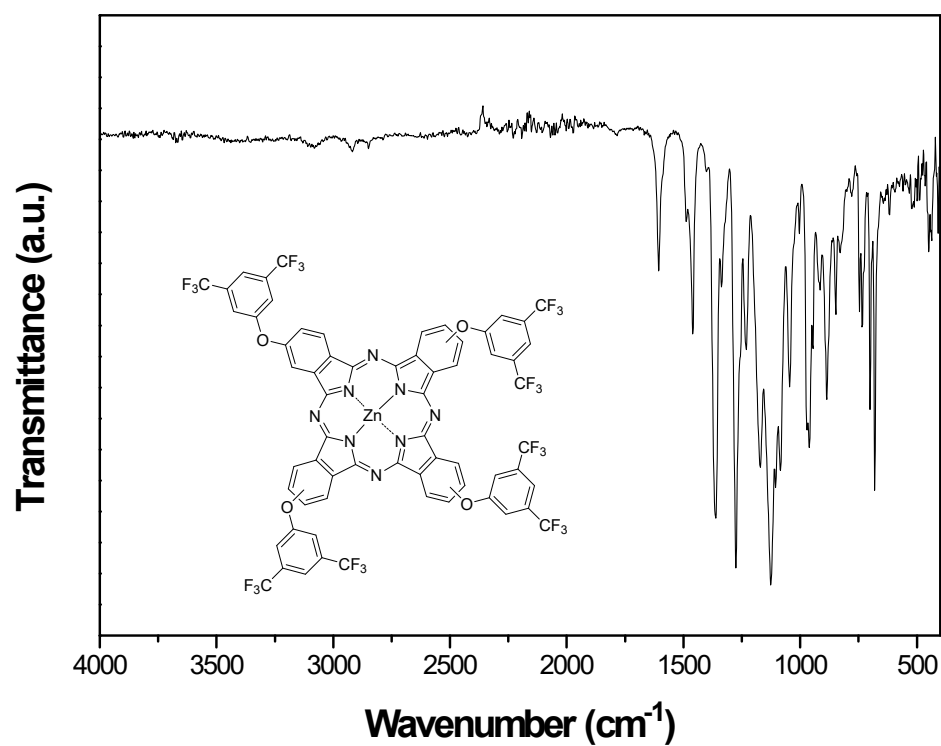

ATR spectrum of tetra-(2-dimethylaminoethoxy)-zinc-phthalocyanine (6).

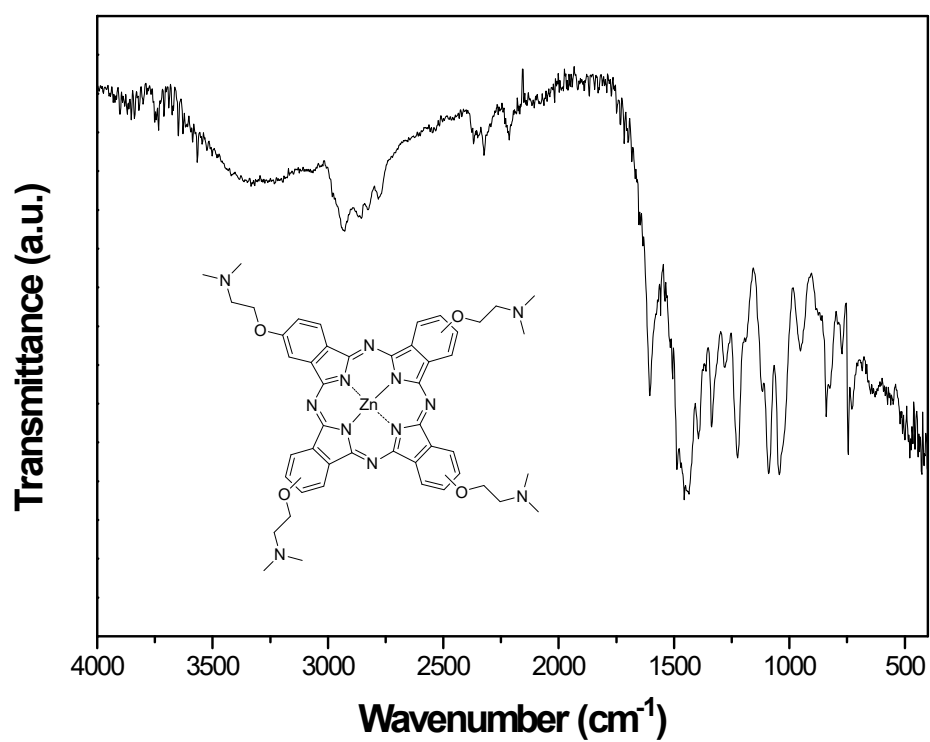

ATR spectrum of tetra-(hexyloxy)-zinc-phthalocyanine (7).

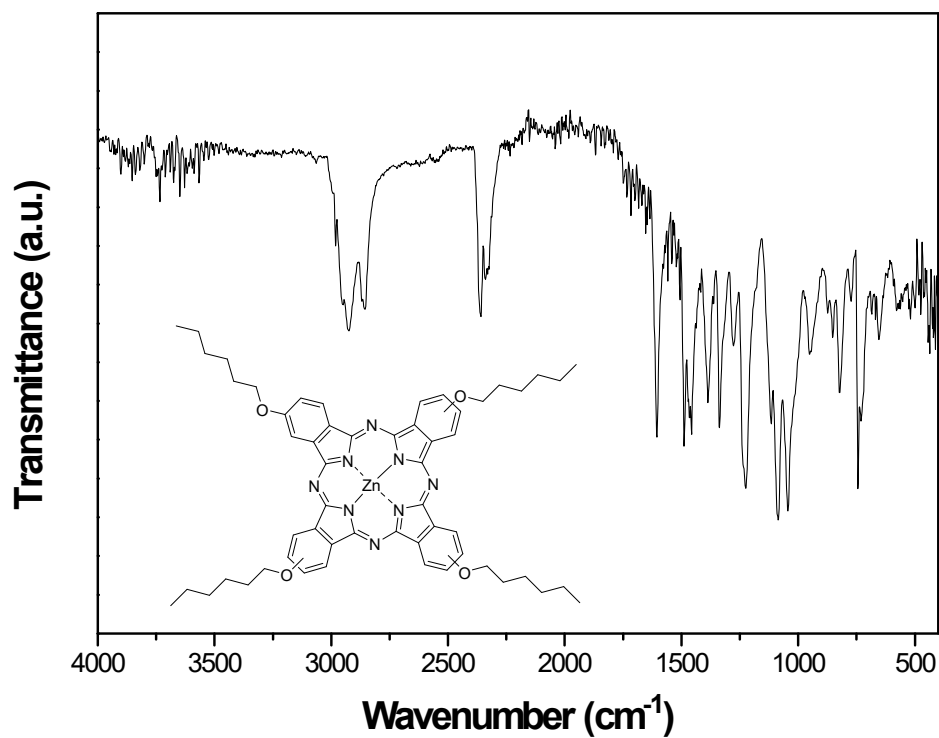

ATR spectrum of octakis(3,5-dimethylphenoxy)-zinc-phthalocyanine (8).

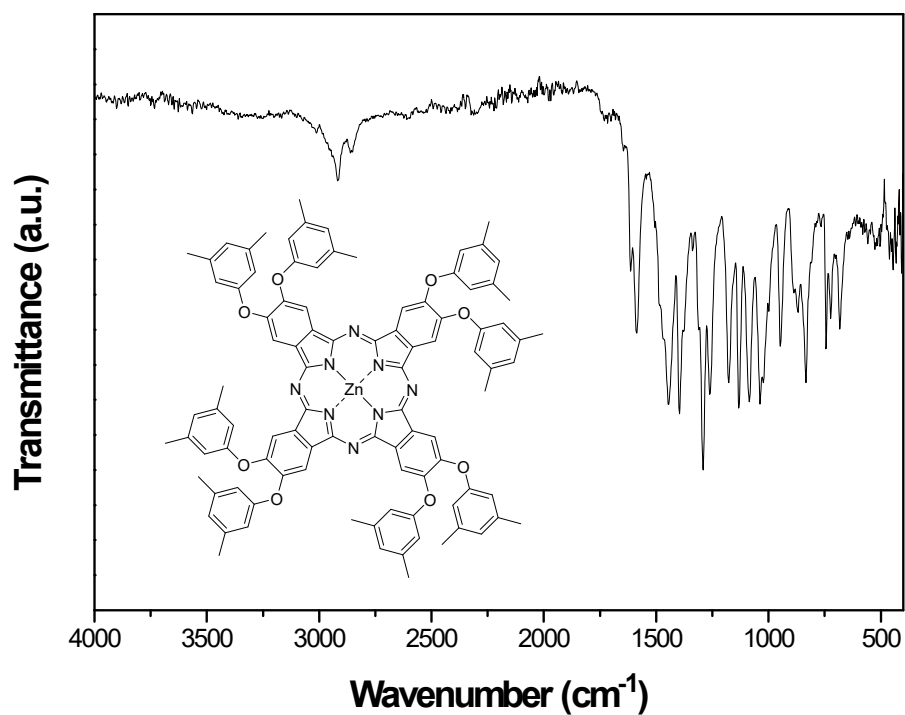

ATR spectrum of octakis(p-tolyloxy)-zinc-phthalocyanine (9).

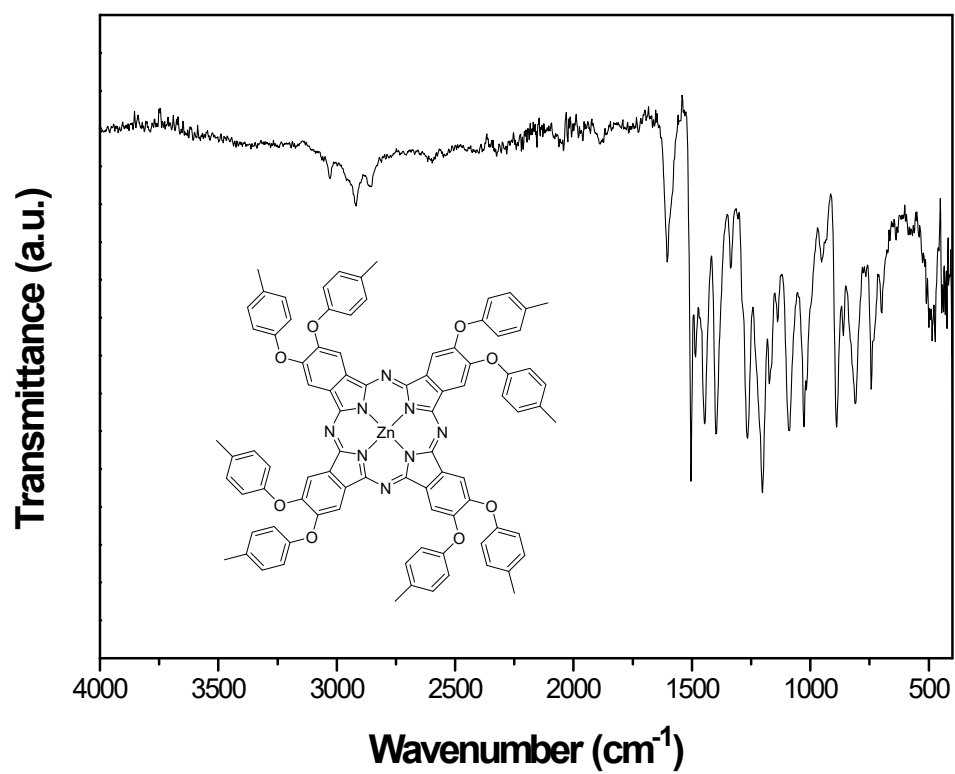

**UV-vis spectra of the synthesized zinc phthalocyanines (1-9).**

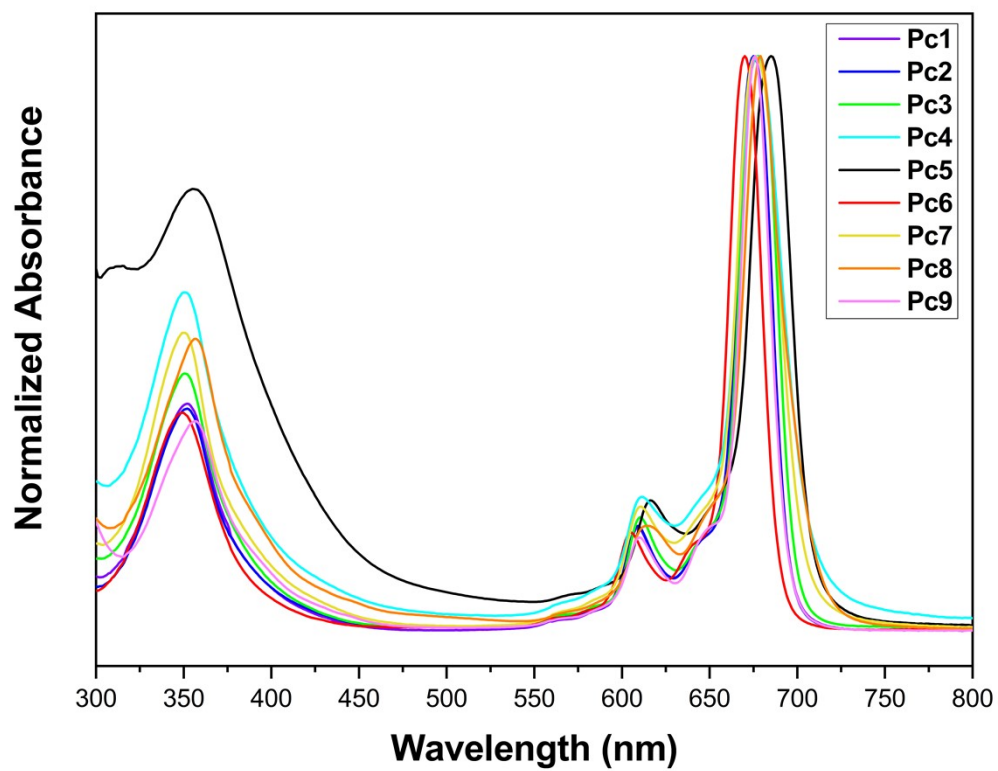

Absorption spectra of zinc phthalocyanines (**1-9**) in THF, except for **4** in pyridine.

**MALDI-TOF spectrum of tetra-(3,5-dimethylphenoxy)-zinc-phthalocyanine (1).**

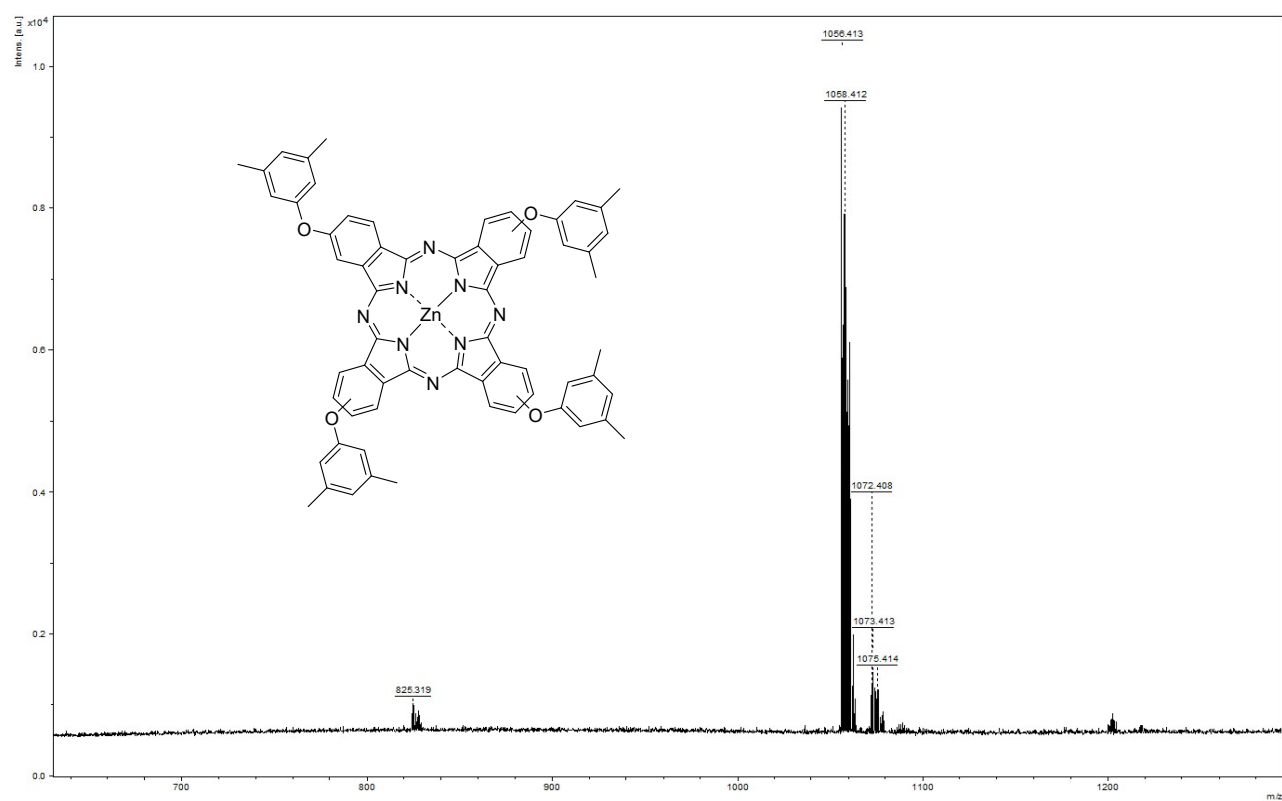

**MALDI-TOF spectrum of tetra-(*p*-toloxy)-zinc-phthalocyanine (2).**

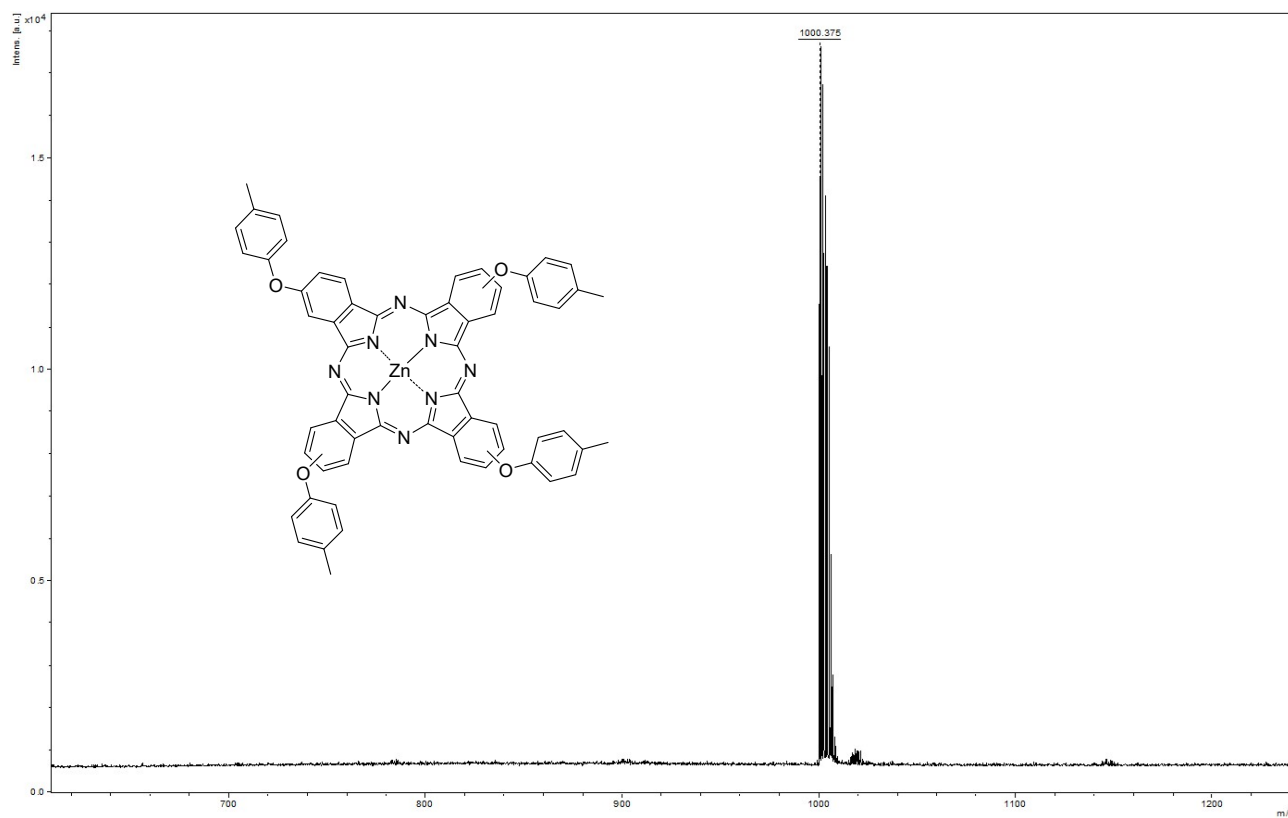

**MALDI-TOF spectrum of tetra-(4-iodo-2,6-dimethylphenoxy)-zinc-phthalocyanine (3).**

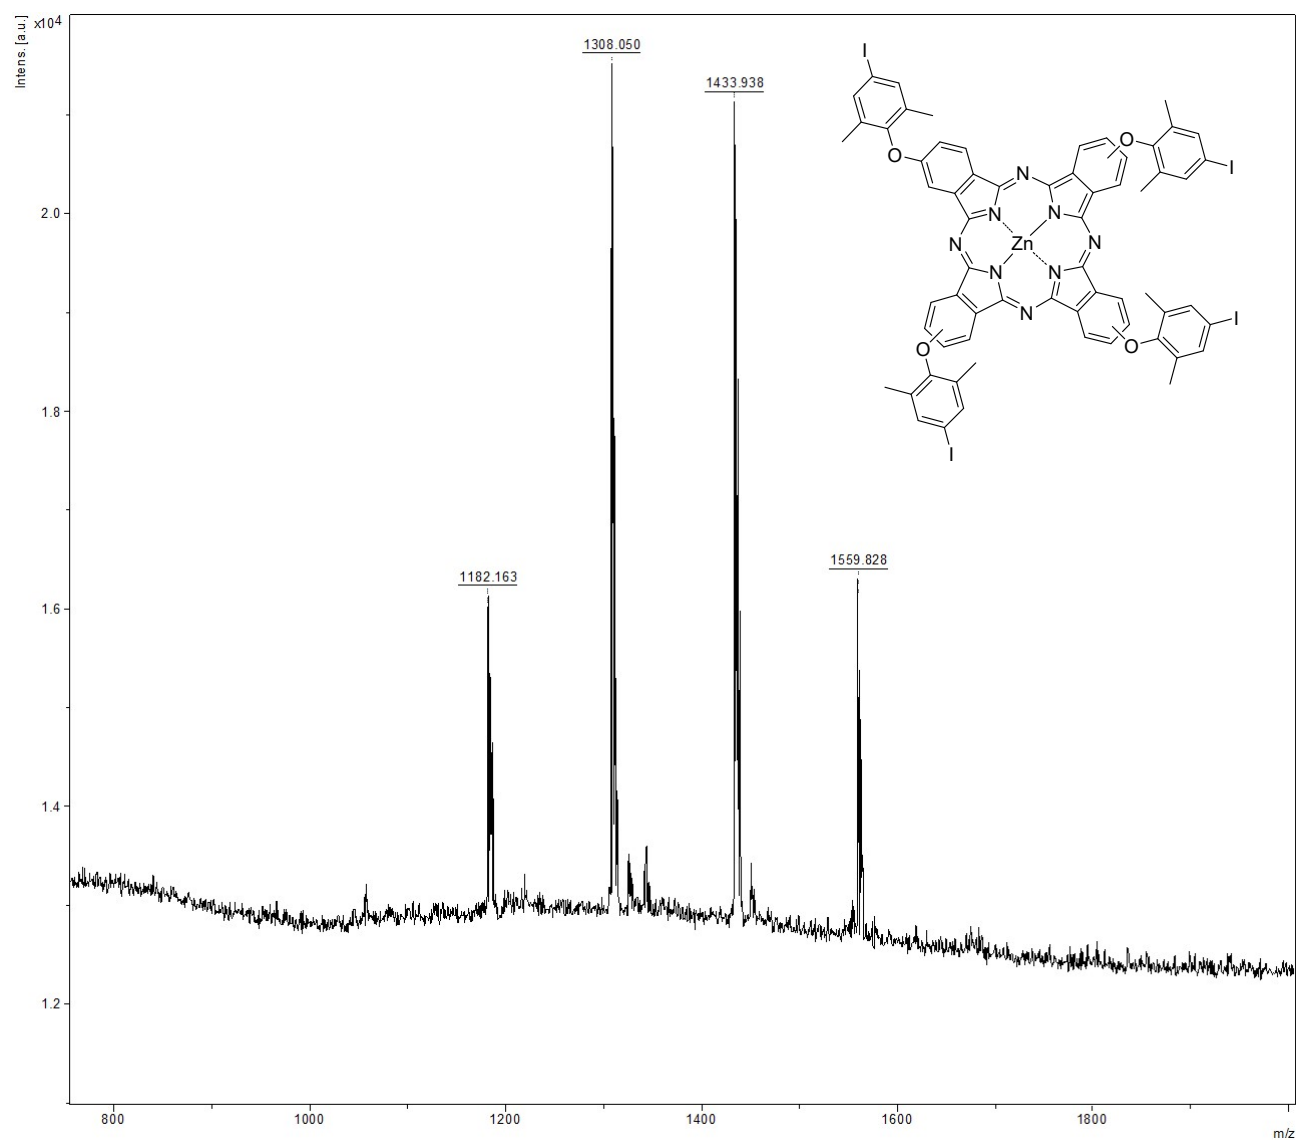

The peaks at m/z 1433.938, 1308.050, and 1182.163 are compatible with the loss of 1, 2, and 3 iodine atoms respectively.

**MALDI-TOF spectrum of tetra-(3,5-bis(trifluoromethyl)phenoxy)-zinc-phthalocyanine (5).**

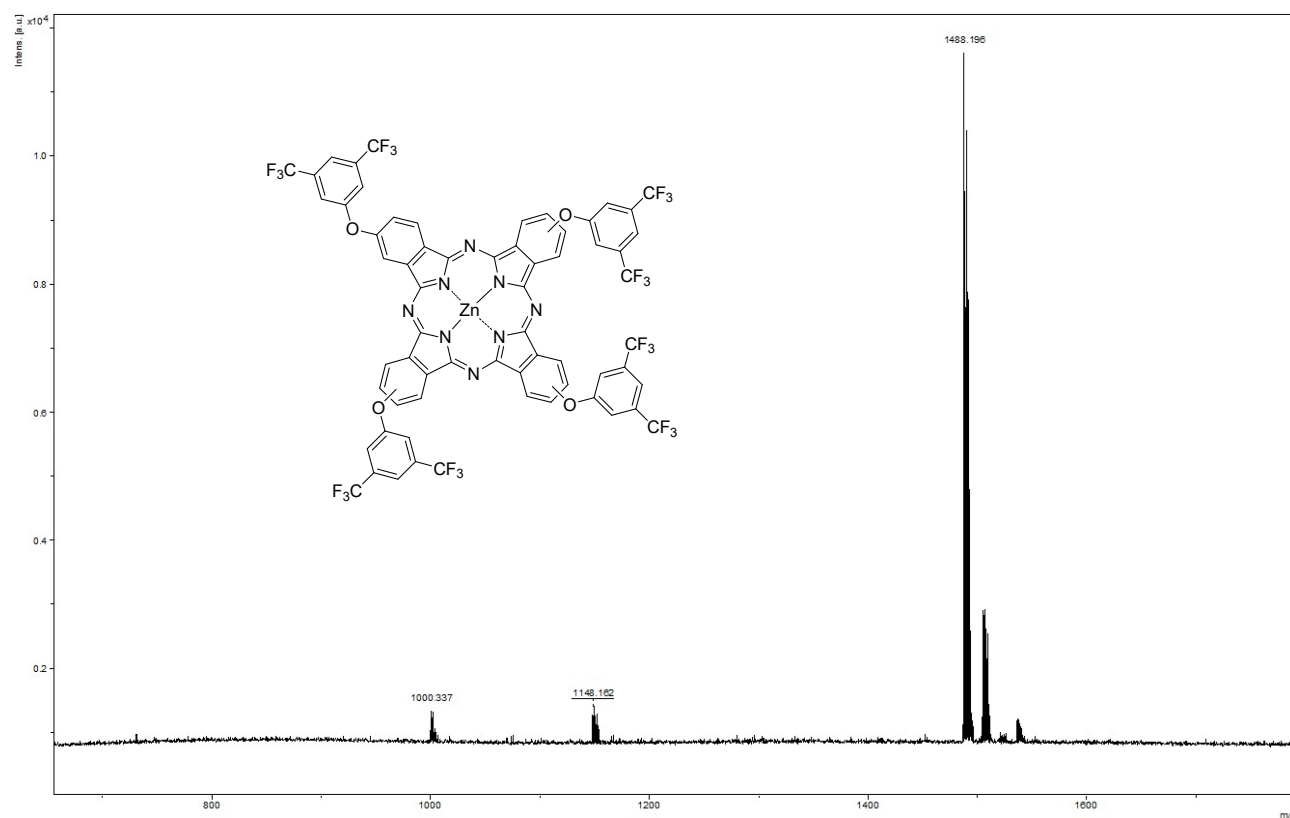



**MALDI-TOF spectrum of tetra-(2-dimethylaminoethoxy)-zinc-phthalocyanine (6).**

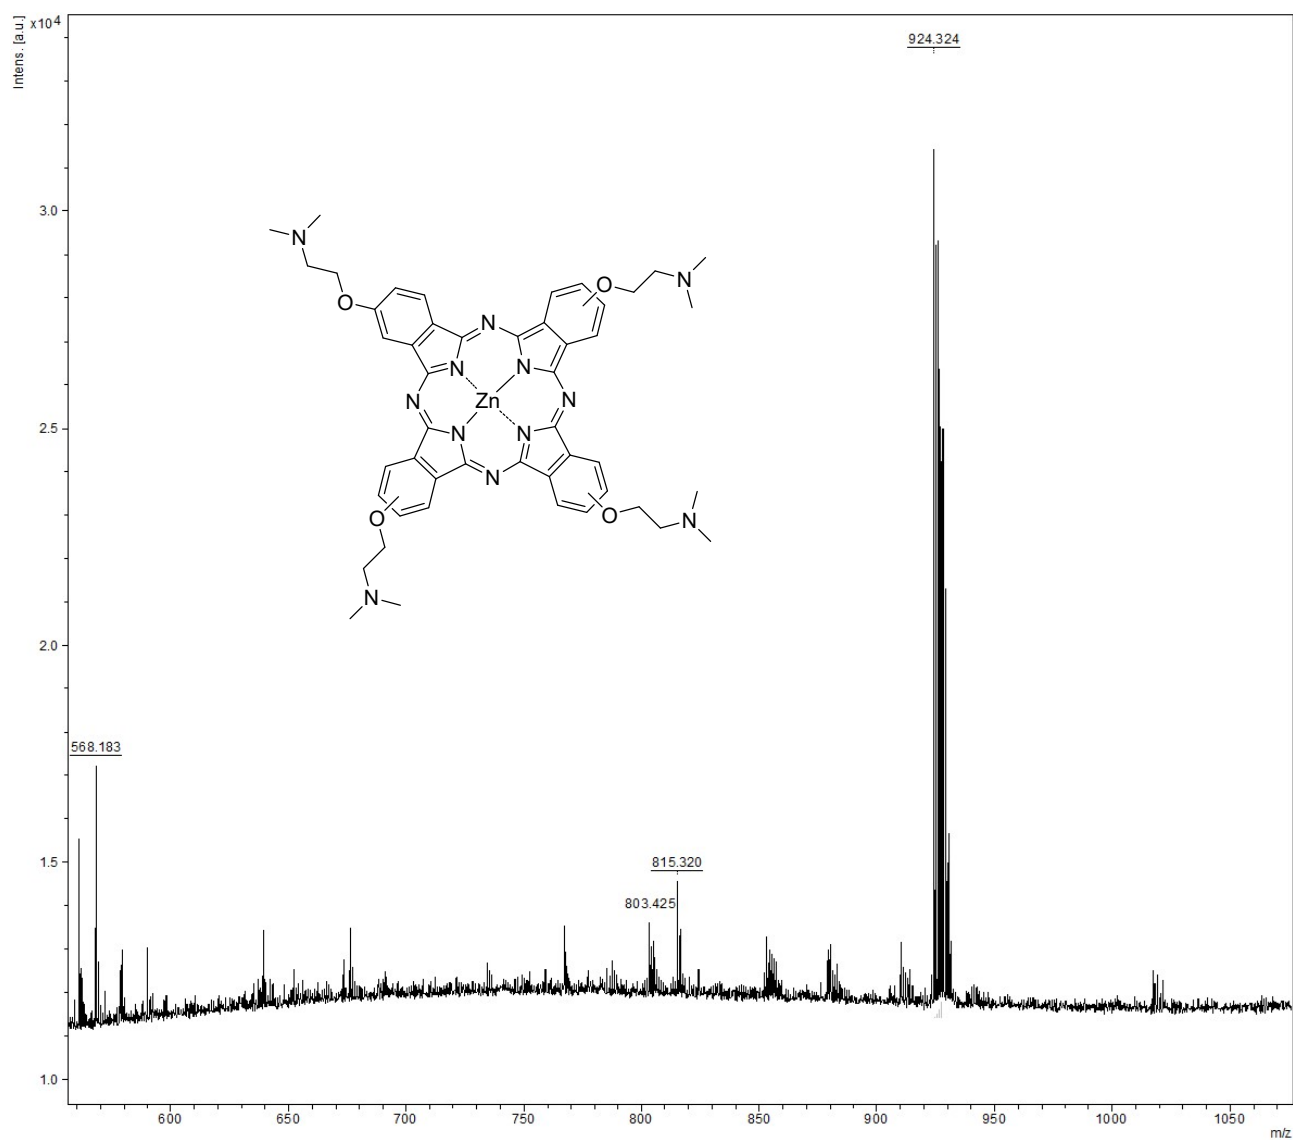

The figure displays the FTIR spectrum of Zn(II) complex 10. The x-axis represents the wavenumber in cm<sup>-1</sup>, ranging from 4000 to 400. The y-axis represents the intensity in arbitrary units (a.u.), scaled by 10<sup>4</sup>. Two prominent peaks are labeled with their wavenumbers: 977.522 cm<sup>-1</sup> and 904.347 cm<sup>-1</sup>. The chemical structure of the Zn(II) complex 10 is shown as an inset. It features a central zinc atom coordinated by four nitrogen atoms in a porphyrin-like macrocycle. Each of the four meso-substituents on the macrocycle is a 4-alkoxyphenyl group, where the alkoxy chain is a 6-oxaheptyl group (CH<sub>2</sub>)<sub>6</sub>OCH<sub>3</sub>.

**MALDI-TOF spectrum of octakis(3,5-dimethylphenoxy)-zinc-phthalocyanine (8).**

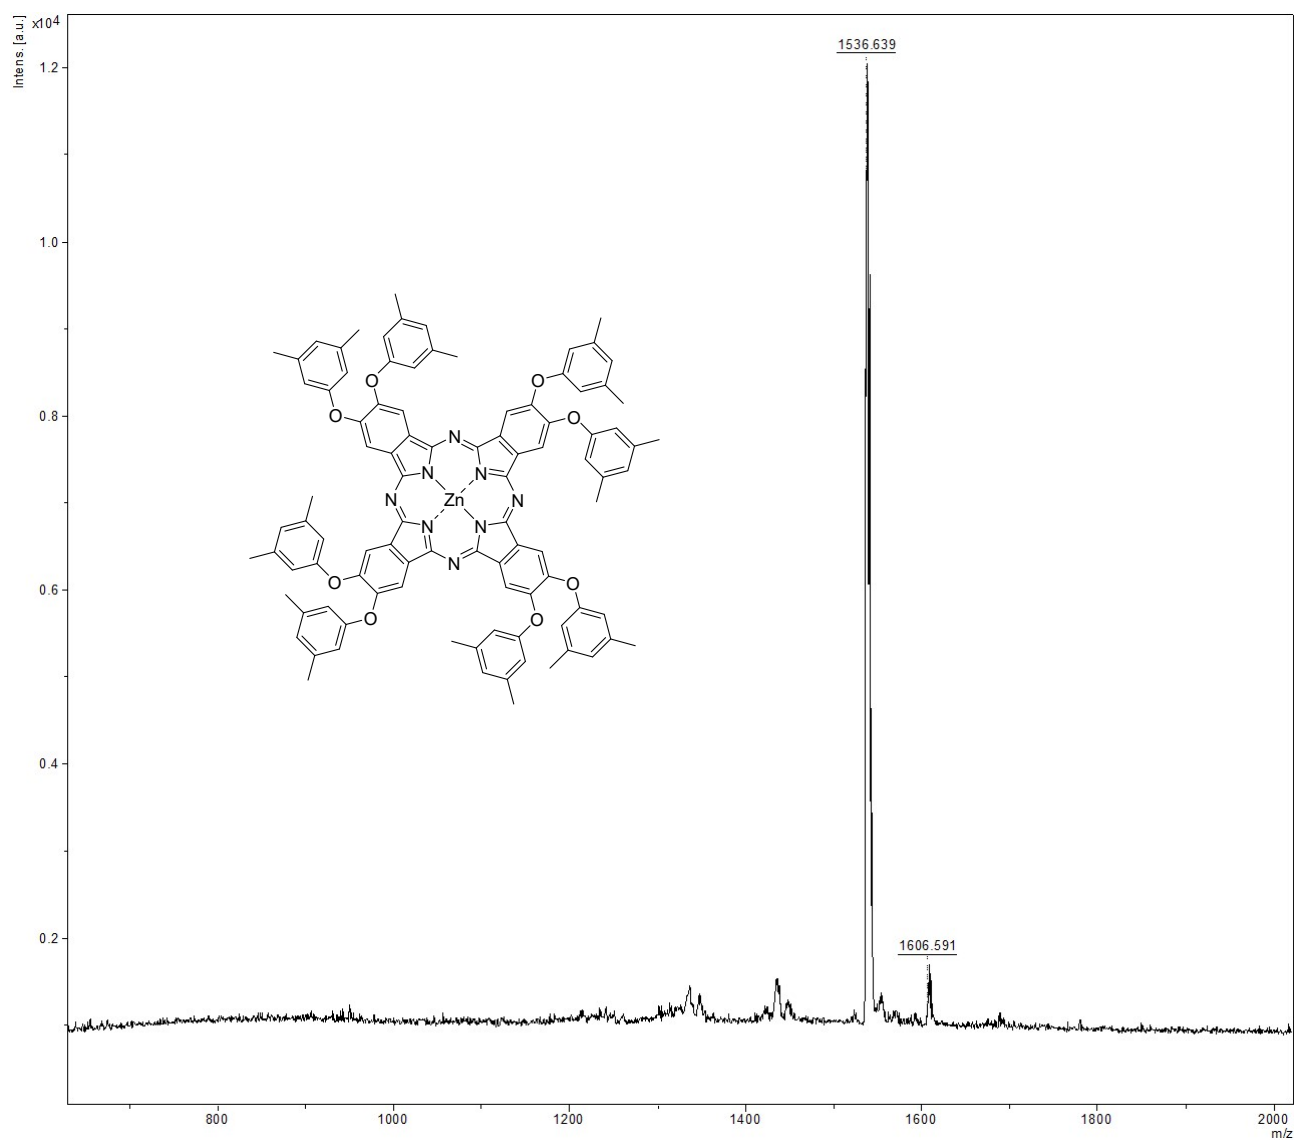

**MALDI-TOF spectrum of octakis(p-tolyloxy)-zinc-phthalocyanine (9).**

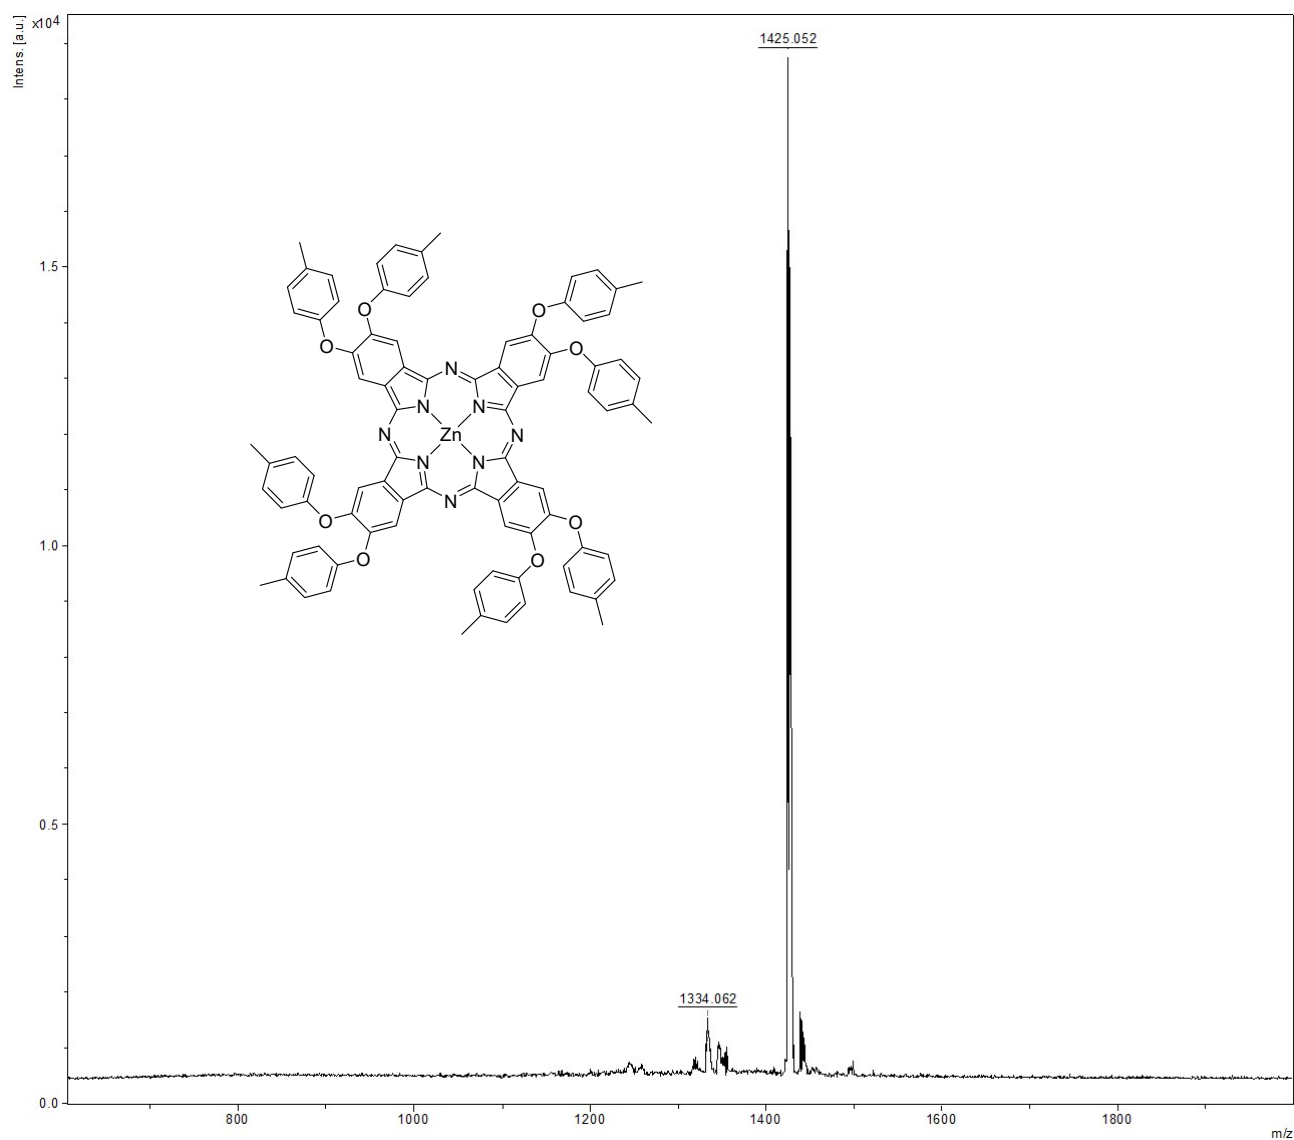

## E-factor calculation

The E-factor (Environmental factor) is used to assess the environmental impact of a chemical process and is defined as the ratio of the total mass of waste generated to the mass of the isolated product.

General equation for the calculation of E-factor:

$$E\text{-factor} = \frac{\text{Mass of total waste (g)}}{\text{Mass of product (g)}}$$

In all calculations, water is excluded from the waste count. This exclusion is consistent with standard practices in green chemistry, where water is typically not considered a harmful by-product.<sup>1</sup>

An estimated 80% of the organic solvents used in the processes described in our paper are recovered and reused, thanks to careful work-up and purification procedures. In particular, solvent mixtures employed in silica pad filtrations are collected and reused multiple times. Although slight variations in polarity may occur upon reuse, the recycled eluents remained suitable for similar separations. This solvent recovery significantly reduces the amount of waste attributed to the process, leading to a more accurate and representative E-factor. The approach reflects an emphasis on sustainability through the minimization of solvent waste and the efficient use of resources.

For literature-reported procedures in which complete experimental details were not available, reasonable approximations were employed to estimate the E-factor, most of which were derived from established sources:<sup>2,3</sup>

- It was assumed that crude products obtained from 1.0 g of starting material would require two washes with 20 mL of water or aqueous solvent mixtures, as well as two washes with 15 mL of organic solvents.
- In cases involving solvent extraction, it was estimated that three separate extractions with 50 mL of organic solvent (totaling 150 mL), along with 1 g of a drying agent such as Na<sub>2</sub>SO<sub>4</sub> or MgSO<sub>4</sub>, would be necessary to isolate 1 g of crude product from the reaction mixture.
- For crystallization steps, it is assumed that 100 mL of solvent are required to isolate 1 g of product, with the procedure performed only once.
- For purifications involving column chromatography, the processing of 1 g of product was assumed to require 400 mL of eluent and a silica gel column packed with 263 g of 60 µm silica gel, as previously reported under ideal conditions (i.e., efficient separation with R<sub>f</sub> > 0.3 and optimal sample loading).<sup>4</sup>
- The density of all aqueous solutions (e.g. HCl 1N or aqueous salt solutions) was approximated to 1.0 g/mL.

These standardized approximations were consistently applied across all procedures to facilitate direct comparison while preserving realistic estimates of material consumption and waste production.

- E-factor calculation for compound 1.

| Chemical                       | Volume (mL) | Density (g/mL) | Mass (g) | Mass of solvents considered toward E-factor (after 80% solvent recovery) (g) |
|--------------------------------|-------------|----------------|----------|------------------------------------------------------------------------------|
| 3,5-dimethylphenol             |             |                | 0.36     |                                                                              |
| DMF                            | 4.0         | 0.948          | 3.792    |                                                                              |
| K <sub>2</sub> CO <sub>3</sub> |             |                | 1.2      |                                                                              |
| 4-nitrophthalonitrile          |             |                | 0.5      |                                                                              |
| Zinc acetate dihydrate         |             |                | 0.172    |                                                                              |
| DBU                            | 0.4         | 1.018          | 0.407    |                                                                              |
| Water                          | 30.0        |                | 30.0     |                                                                              |
| HCl 1N                         |             |                | 2.0      |                                                                              |
| Silica gel                     |             |                | 8.0      |                                                                              |
| THF                            | 19.5        | 0.888          | 17.32    | 3.463                                                                        |
| Hexane                         | 37.5        | 0.661          | 24.79    | 4.958                                                                        |
| Methanol                       | 45.0        | 0.792          | 35.64    | 7.128                                                                        |

Amount of product = 0.364 g (48% yield)

Total E-Factor = 257.7

E-factor 80% solvent recovery = 86.9

- E-factor calculation for compound 2.

| Chemical                       | Volume (mL) | Density (g/mL) | Mass (g) | Mass of solvents considered toward E-factor (after 80% solvent recovery) (g) |
|--------------------------------|-------------|----------------|----------|------------------------------------------------------------------------------|
| 4-methylphenol                 |             |                | 0.319    |                                                                              |
| DMF                            | 4.0         | 0.948          | 3.792    |                                                                              |
| K <sub>2</sub> CO <sub>3</sub> |             |                | 1.2      |                                                                              |
| 4-nitrophthalonitrile          |             |                | 0.5      |                                                                              |
| Zinc acetate dihydrate         |             |                | 0.172    |                                                                              |
| DBU                            | 0.4         | 1.018          | 0.407    |                                                                              |
| Water                          | 28.0        |                | 28.0     |                                                                              |
| HCl 1N                         |             |                | 2.0      |                                                                              |
| Silica gel                     |             |                | 10.0     |                                                                              |
| THF                            | 28.75       | 0.888          | 25.53    | 5.106                                                                        |
| Hexane                         | 76.25       | 0.661          | 50.40    | 10.08                                                                        |
| Methanol                       | 10.0        | 0.792          | 7.92     | 1.584                                                                        |

Amount of product = 0.313 g (43% yield)

Total E-factor = 326.2

E-factor 80% solvent recovery = 111.3

- E-factor calculation for compound **3**.

| Chemical                       | Volume (mL) | Density (g/mL) | Mass (g)     | Mass of solvents considered toward E-factor (after 80% solvent recovery) (g) |
|--------------------------------|-------------|----------------|--------------|------------------------------------------------------------------------------|
| 4-iodo-2,6-dimethylphenol      |             |                | <i>0.365</i> |                                                                              |
| DMF                            | 2.5         | 0.948          | <i>2.37</i>  |                                                                              |
| K <sub>2</sub> CO <sub>3</sub> |             |                | <i>0.6</i>   |                                                                              |
| 4-nitrophthalonitrile          |             |                | <i>0.25</i>  |                                                                              |
| Zinc acetate dihydrate         |             |                | <i>0.086</i> |                                                                              |
| DBU                            | 0.2         | 1.018          | <i>0.204</i> |                                                                              |
| Water                          | 4.5         |                | <i>4.5</i>   |                                                                              |
| HCl 1N                         |             |                | <i>0.5</i>   |                                                                              |
| Silica gel                     |             |                | <i>13.0</i>  |                                                                              |
| THF                            | 40.5        | 0.888          | <i>35.96</i> | <i>7.193</i>                                                                 |
| Petroleum ether                | 66.0        | 0.666          | <i>43.96</i> | <i>8.791</i>                                                                 |
| Methanol                       | 25.0        | 0.792          | <i>19.8</i>  | <i>3.96</i>                                                                  |

Amount of product = 0.210 g (37% yield)

Total E-factor = 556.6

E-factor 80% solvent recovery = 176.7

- E-factor calculation for compound **5**.

| Chemical                       | Volume (mL) | Density (g/mL) | Mass (g)      | Mass of solvents considered toward E-factor (after 80% solvent recovery) (g) |
|--------------------------------|-------------|----------------|---------------|------------------------------------------------------------------------------|
| 3,5-bis(trifluoromethyl)phenol |             |                | <i>0.678</i>  |                                                                              |
| DMF                            | 4.0         | 0.948          | <i>3.792</i>  |                                                                              |
| K <sub>2</sub> CO <sub>3</sub> |             |                | <i>1.2</i>    |                                                                              |
| 4-nitrophthalonitrile          |             |                | <i>0.5</i>    |                                                                              |
| Zinc acetate dihydrate         |             |                | <i>0.172</i>  |                                                                              |
| DBU                            | 0.4         | 1.018          | <i>0.407</i>  |                                                                              |
| Water                          | 29.0        |                | <i>29.0</i>   |                                                                              |
| Silica gel                     |             |                | <i>10.0</i>   |                                                                              |
| Hexane                         | 31.4        | 0.661          | <i>20.755</i> | <i>4.151</i>                                                                 |
| Ethyl acetate                  | 20.6        | 0.902          | <i>18.501</i> | <i>3.716</i>                                                                 |

Amount of product = 0.290 g (27% yield)

Total E-factor = 192.1

E-factor 80% solvent recovery = 83.9

- E-factor calculation for compound 6.

| Chemical                       | Volume (mL) | Density (g/mL) | Mass (g) | Mass of solvents considered toward E-factor (after 80% solvent recovery) (g) |
|--------------------------------|-------------|----------------|----------|------------------------------------------------------------------------------|
| 2-(dimethylamino)ethanol       | 0.4         | 0.89           | 0.356    |                                                                              |
| DMF                            | 4.0         | 0.948          | 3.792    |                                                                              |
| K <sub>2</sub> CO <sub>3</sub> |             |                | 1.2      |                                                                              |
| 4-nitrophthalonitrile          |             |                | 0.5      |                                                                              |
| Zinc acetate dihydrate         |             |                | 0.172    |                                                                              |
| DBU                            | 0.4         | 1.018          | 0.407    |                                                                              |
| Water                          | 34.0        |                | 4.5      |                                                                              |
| HCl 1N                         | 4.0         |                | 4.0      |                                                                              |
| Methanol                       | 7.0         | 0.792          | 5.544    | 1.109                                                                        |

Amount of product = 0.330 g (49% yield)

Total E-factor: 47.4

E-factor 80% solvent recovery = 34.0

- E-factor calculation for compound 7.

| Chemical                       | Volume (mL) | Density (g/mL) | Mass (g) | Mass of solvents considered toward E-factor (after 80% solvent recovery) (g) |
|--------------------------------|-------------|----------------|----------|------------------------------------------------------------------------------|
| Hexan-1-ol                     | 0.4         | 0.814          | 0.326    |                                                                              |
| DMF                            | 4.0         | 0.948          | 3.792    |                                                                              |
| K <sub>2</sub> CO <sub>3</sub> |             |                | 1.2      |                                                                              |
| 4-nitrophthalonitrile          |             |                | 0.5      |                                                                              |
| Zinc acetate dihydrate         |             |                | 0.172    |                                                                              |
| DBU                            | 0.4         | 1.018          | 0.407    |                                                                              |
| HCl 1N                         | 2.0         |                | 2.0      |                                                                              |
| Water                          | 22.0        |                | 22.0     |                                                                              |
| Silica gel                     |             |                | 10.0     |                                                                              |
| THF                            | 20.0        | 0.888          | 17.76    | 3.552                                                                        |
| Hexane                         | 30.0        | 0.661          | 19.83    | 3.966                                                                        |
| Methanol                       | 19.0        | 0.792          | 15.048   | 3.010                                                                        |

Amount of product = 0.16 g (22% yield)

Total E-factor = 443.0

E-factor 80% solvent recovery = 179.8



- E-factor calculation for compound **8**.

| Chemical                       | Volume (mL) | Density (g/mL) | Mass (g)     | Mass of solvents considered toward E-factor (after 80% solvent recovery) (g) |
|--------------------------------|-------------|----------------|--------------|------------------------------------------------------------------------------|
| 3,5-dimethylphenol             |             |                | <i>0.368</i> |                                                                              |
| DMF                            | 4.0         | 0.948          | <i>3.792</i> |                                                                              |
| K <sub>2</sub> CO <sub>3</sub> |             |                | <i>0.423</i> |                                                                              |
| 4,5-dichlorophthalonitrile     |             |                | <i>0.2</i>   |                                                                              |
| Zinc acetate dihydrate         |             |                | <i>0.06</i>  |                                                                              |
| DBU                            | 0.152       | 1.018          | <i>0.155</i> |                                                                              |
| HCl 1N                         | 5.0         |                | <i>5.0</i>   |                                                                              |
| Water                          | 10.0        |                | <i>10.0</i>  |                                                                              |
| Silica gel                     |             |                | <i>10.0</i>  |                                                                              |
| THF                            | 30.0        | 0.888          | <i>26.64</i> | <i>5.328</i>                                                                 |
| Hexane                         | 60.0        | 0.661          | <i>39.66</i> | <i>7.932</i>                                                                 |
| Methanol                       | 10.0        | 0.792          | <i>7.92</i>  | <i>1.584</i>                                                                 |

Grams of product = 0.118 g (30% yield)

Total E-factor = 797.4

E-factor 80% solvent recovery = 294.3

- E-factor calculation for compound **9**.

| Chemical                       | Volume (mL) | Density (g/mL) | Mass (g)     | Mass of solvents considered toward E-factor (after 80% solvent recovery) (g) |
|--------------------------------|-------------|----------------|--------------|------------------------------------------------------------------------------|
| 4-methylphenol                 |             |                | <i>0.34</i>  |                                                                              |
| DMF                            | 4.0         | 0.948          | <i>3.792</i> |                                                                              |
| K <sub>2</sub> CO <sub>3</sub> |             |                | <i>0.423</i> |                                                                              |
| 4,5-dichlorophthalonitrile     |             |                | <i>0.2</i>   |                                                                              |
| Zinc acetate dihydrate         |             |                | <i>0.061</i> |                                                                              |
| DBU                            | 0.152       | 1.018          | <i>0.155</i> |                                                                              |
| HCl 1N                         | 5.0         |                | <i>5.0</i>   |                                                                              |
| Water                          | 10.0        |                | <i>10.0</i>  |                                                                              |
| Silica gel                     |             |                | <i>10.0</i>  |                                                                              |
| THF                            | 17.7        | 0.888          | <i>15.73</i> | <i>3.146</i>                                                                 |
| Hexane                         | 57.3        | 0.661          | <i>38.16</i> | <i>7.630</i>                                                                 |
| Methanol                       | 15.0        | 0.792          | <i>11.88</i> | <i>2.376</i>                                                                 |

Amount of product = 0.114 g (31% yield)

Total E-factor = 751.1

E-factor 80% solvent recovery = 289.5

E-factor calculation for compound **2** synthesized according to the literature method.<sup>5</sup>

| Chemical                                             | Volume (mL) | Density (g/mL) | Mass (g) | Mass of solvents considering a 80% recovery (g) |
|------------------------------------------------------|-------------|----------------|----------|-------------------------------------------------|
| 4-methylphenol                                       |             |                | 6.92     |                                                 |
| 4-nitrophthalonitrile                                |             |                | 5.41     |                                                 |
| DMSO                                                 | 60.0        | 1.100          | 66.0     |                                                 |
| K <sub>2</sub> CO <sub>3</sub>                       |             |                | 10.35    |                                                 |
| Dichloromethane                                      | 200.0       | 1.327          | 265.4    | 53.08                                           |
| Na <sub>2</sub> CO <sub>3</sub> 5% solution in water | 200.0       |                | 200.0    |                                                 |
| Sodium sulfate                                       |             |                | 7.0      |                                                 |
| Hexane                                               | 680.0       | 0.661          | 449.48   | 89.90                                           |

Amount of product = 6.83 g (73% yield)

E-factor = 147.0

E-factor assuming 80% solvent recovery = 63.2

| Chemical                          | Volume (mL) | Density (g/mL) | Mass (g) | Mass of solvents considering a 80% recovery (g) |
|-----------------------------------|-------------|----------------|----------|-------------------------------------------------|
| 4-(p-methylphenoxy)phthalonitrile |             |                | 2.34     |                                                 |
| Zinc powder                       |             |                | 1.308    |                                                 |
| Ammonium molybdate                |             |                | 0.2      |                                                 |
| Neutral alumina                   |             |                | 263.0    |                                                 |
| Toluene                           | 3.0         | 0.862          | 2.586    | 0.52                                            |
| THF                               | 1025.0      | 0.888          | 910.2    | 182.04                                          |
| Chloroform                        | 30.0        | 1.489          | 44.67    | 8.93                                            |
| Methanol                          | 450.0       | 0.792          | 356.4    | 71.28                                           |

Amount of product = 1.22 g (52% yield)

E-factor = 1294.7

E-factor assuming 80% solvent recovery = 433.1

**Total yield: 38%, total E-factor: 1441.7, total E-factor assuming 80% solvent recovery = 496.3**

E-factor calculation for compound **5** synthesized according to the literature method.<sup>6</sup>

| Chemical                       | Volume (mL) | Density (g/mL) | Mass (g) | Mass of solvents considering a 80% recovery (g) |
|--------------------------------|-------------|----------------|----------|-------------------------------------------------|
| 4-nitrophthalonitrile          |             |                | 1.0      |                                                 |
| 3,5-bis(trifluoromethyl)phenol |             |                | 1.66     |                                                 |
| DMF                            | 40.0        | 0.948          | 37.92    |                                                 |
| K <sub>2</sub> CO <sub>3</sub> |             |                | 7.98     |                                                 |
| Ethanol                        | 130.0       | 0.789          | 102.57   | 20.514                                          |

Amount of product = 1.3 g (63% yield)

E-factor = 115.2

E-factor assuming 80% solvent recovery = 52.1

| Chemical                                       | Volume (mL) | Density (g/mL) | Mass (g) | Mass of solvents considering a 80% recovery (g) |
|------------------------------------------------|-------------|----------------|----------|-------------------------------------------------|
| 3,5-bis(trifluoromethyl)phenoxy]phthalonitrile |             |                | 0.06     |                                                 |
| Zinc acetate                                   |             |                | 0.01     |                                                 |
| Dimethylaminoethanol                           | 2.0         |                | 1.78     |                                                 |
| Hexane                                         | 4.5         | 0.661          | 2.97     | 0.594                                           |
| Silica gel                                     |             |                | 2.89     |                                                 |
| Dichloromethane                                | 4.26        | 1.327          | 5.65     | 1.13                                            |
| Methanol                                       | 0.14        | 0.792          | 0.11     | 0.022                                           |

Amount of product = 0.012 g (11% yield)

E-factor = 1121.5

E-factor assuming 80% solvent recovery = 539.5

**Total yield: 7%, total E-factor: 1236.7, total E-factor assuming 80% solvent recovery = 591.6.**

E-factor calculation for compound **6** synthesized according to the literature.

Synthetic procedure with 13% total yield:<sup>7</sup>

- The amount of DMF was estimated to be 4 mL. To calculate the quantity of solvent required for extraction, a crude product mass of 0.75 g was assumed.

| Chemical                        | Volume (mL) | Density (g/mL) | Mass (g) | Mass of solvents considering a 80% recovery (g) |
|---------------------------------|-------------|----------------|----------|-------------------------------------------------|
| 4-nitrophthalonitrile           |             |                | 0.5      |                                                 |
| 1,2-(dimethylamino)-ethanol     |             |                | 0.356    |                                                 |
| K <sub>2</sub> CO <sub>3</sub>  |             |                | 4.0      |                                                 |
| DMF                             | 4.0         | 0.948          | 3.792    |                                                 |
| Chloroform (extraction)         | 398.2       | 1.489          | 592.92   | 118.584                                         |
| Na <sub>2</sub> SO <sub>4</sub> |             |                | 0.75     |                                                 |
| Silica gel                      |             |                | 197.25   |                                                 |
| Methanol                        | 14.3        | 0.792          | 11.326   | 2.265                                           |

Amount of product = 0.565 g (91% yield)

E-factor = 1434.2

E-factor assuming 80% solvent recovery = 579.0

- A crude product mass of 250 mg was assumed.

| Chemical                                  | Volume (mL) | Density (g/mL) | Mass (g) | Mass of solvents considering a 80% recovery (g) |
|-------------------------------------------|-------------|----------------|----------|-------------------------------------------------|
| 4-(2-(dimethylamino)ethoxy)phthalonitrile |             |                | 0.215    |                                                 |
| DBU                                       |             |                | 0.152    |                                                 |
| Pentanol                                  | 8.0         |                | 6.488    |                                                 |
| Zinc acetate                              |             |                | 0.064    |                                                 |
| Aqueous acetic acid                       | 6.45        | 1.0            | 6.45     |                                                 |
| Diethyl ether                             | 6.45        | 0.713          | 4.599    | 0.92                                            |
| Ethyl acetate                             | 6.45        | 0.902          | 5.818    | 1.164                                           |
| Dichloromethane                           | 6.45        | 1.327          | 8.559    | 1.712                                           |
| Chloroform                                | 83.95       | 1.489          | 125.001  | 25.00                                           |
| K <sub>2</sub> CO <sub>3</sub>            | 37.5        |                | 37.5     |                                                 |
| Silica gel                                |             |                | 65.75    |                                                 |
| Methanol                                  | 40.0        |                | 31.68    | 6.336                                           |

Product obtained = 0.032 g (14% yield)

E-factor = 9132.6

E-factor assuming 80% solvent recovery = 4741.2

**Total yield: 13%, total E-factor: 10566.8, Total E-factor assuming 80% solvent recovery = 5320.2.**

Synthetic procedure with 55% total yield:<sup>8</sup>

The corresponding phthalonitrile precursor for this synthesis was prepared according to reference <sup>7</sup>.

- For the calculation of extraction solvent volumes, it was assumed that 0.6 g of crude product was obtained.

| Chemical                                  | Volume (mL) | Density (g/mL) | Mass (g) | Mass of solvents considering a 80% recovery (g) |
|-------------------------------------------|-------------|----------------|----------|-------------------------------------------------|
| 4-(2-(dimethylamino)ethoxy)phthalonitrile |             |                | 0.5      |                                                 |
| DMAE                                      | 0.7         | 0.890          | 0.623    |                                                 |
| Butan-1-ol                                | 0.7         | 0.810          | 0.567    |                                                 |
| Zinc acetate                              |             |                | 0.15     |                                                 |
| Dichloromethane                           | 90.0        | 1.327          | 119.43   | 23.886                                          |
| Na <sub>2</sub> SO <sub>4</sub>           |             |                | 0.6      |                                                 |
| Al <sub>2</sub> O <sub>3</sub>            |             |                | 50.0     |                                                 |
| Chloroform                                | 240.0       | 1.489          | 357.36   | 71.472                                          |

Amount of product = 0.32 g (60% yield)

E-factor = 1652.8

E-factor assuming 80% solvent recovery = 460.9

**Total yield: 55%, total E-factor: 3087.0, total E-factor assuming 80% solvent recovery: 1039.9.**

## References

- (1) Sheldon, R. A. The E Factor at 30: A Passion for Pollution Prevention. *Green Chem.* **2023**, 25 (5), 1704–1728. <https://doi.org/10.1039/D2GC04747K>.
- (2) Osedach, T. P.; Andrew, T. L.; Bulović, V. Effect of Synthetic Accessibility on the Commercial Viability of Organic Photovoltaics. *Energy Environ. Sci.* **2013**, 6 (3), 711. <https://doi.org/10.1039/c3ee24138f>.
- (3) Zanotti, G.; Palmeri, F.; Raglione, V. Phthalocyanines Synthesis: A State-of-The-Art Review of Sustainable Approaches Through Green Chemistry Metrics. *Chemistry – A European Journal* **2024**, 30 (44), e202400908. <https://doi.org/10.1002/chem.202400908>.
- (4) Ghiglietti, E.; Incarbone, E. A.; Mattiello, S.; Beverina, L. Efficient Copper-Free Sonogashira Coupling in Water and under Ambient Atmosphere. *Eur J Org Chem* **2024**, 27 (21), e202400223. <https://doi.org/10.1002/ejoc.202400223>.
- (5) Shankar, R.; Vasudevan, P.; Jha, N. K. Synthesis, Characterisation, Association in Solution and Electrical Conductivity in Solid State of a Few Aryloxy Substituted Soluble Phthalocyanines. *Synthesis and Reactivity in Inorganic and Metal-Organic Chemistry* **1997**, 27 (9), 1277–1297. <https://doi.org/10.1080/00945719708000158>.
- (6) Korkmaz, E.; Ahmetali, E.; Atmaca, G. Y.; Karaoğlu, H. P.; Erdoğan, A.; Koçak, M. B. Investigation of Photophysical and Photochemical Properties of Phthalocyanines Bearing Fluorinated Groups. *Monatsh Chem* **2020**, 151 (2), 181–190. <https://doi.org/10.1007/s00706-019-02543-y>.
- (7) Zhang, L.; Huang, J.; Ren, L.; Bai, M.; Wu, L.; Zhai, B.; Zhou, X. Synthesis and Evaluation of Cationic Phthalocyanine Derivatives as Potential Inhibitors of Telomerase. *Bioorganic & Medicinal Chemistry* **2008**, 16 (1), 303–312. <https://doi.org/10.1016/j.bmc.2007.09.037>.
- (8) Pinto, S. M. A.; Tomé, V. A.; Calvete, M. J. F.; Pereira, M. M.; Burrows, H. D.; Cardoso, A. M. S.; Pallier, A.; C.A. Castro, M. M.; Tóth, É.; Geraldès, C. F. G. C. The Quest for Biocompatible Phthalocyanines for Molecular Imaging: Photophysics, Relaxometry and Cytotoxicity Studies. *Journal of Inorganic Biochemistry* **2016**, 154, 50–59. <https://doi.org/10.1016/j.jinorgbio.2015.10.013>.
